# Joint structural annotation of small molecules using liquid chromatography retention order and tandem mass spectrometry data

Eric Bach<sup>1,\*</sup>, Emma L. Schymanski<sup>2</sup> and Juho Rousu<sup>1,\*</sup>

<sup>1</sup> Department of Computer Science, Aalto University, Espoo, Finland

<sup>2</sup> Luxembourg Centre for Systems Biomedicine (LCSB), University of Luxembourg,  
6 avenue du Swing, L-4367 Belvaux, Luxembourg.

\* Corresponding author: [firstname.lastname@aalto.fi](mailto:firstname.lastname@aalto.fi)

## Abstract

We present LC-MS<sup>2</sup>Struct, a machine learning framework for structural annotation of small molecule data arising from liquid chromatography-tandem mass spectrometry (LC-MS<sup>2</sup>) measurements. LC-MS<sup>2</sup>Struct predicts the annotations for a set of mass spectrometry features in a sample, using the ions' observed retention orders and the output of state-of-the-art MS<sup>2</sup> scorers. LC-MS<sup>2</sup>Struct is based on a novel structured prediction model trained to benefit from dependencies between retention times and the mass spectral features for an improved annotation accuracy.

We demonstrate the benefit of LC-MS<sup>2</sup>Struct on a comprehensive dataset containing reference MS<sup>2</sup> spectra and retention times of 4327 molecules from MassBank, measured using a variety of LC conditions. We show that LC-MS<sup>2</sup>Struct obtains significantly higher annotation accuracy than methods based on retention time prediction. Furthermore, LC-MS<sup>2</sup>Struct improves the annotation accuracy of state-of-the-art MS<sup>2</sup> scorers by up to 66.1 percent and even up to 95.9 percent when predicting stereochemical variants of small molecules.

## Introduction

Structural annotation of small molecules in biological samples is a challenging task and a bottleneck in various research fields including biomedicine, biotechnology, drug discovery and environmental sciences. Samples in untargeted metabolomics studies typically contain thousands of different molecules, most of which remain unidentified [1–3]. Liquid chromatography (LC) tandem mass spectrometry (LC-MS<sup>2</sup>) is one of the most widely used analysis platforms [4], as it allows for high-throughput screening, has high sensitivity and is applicable to a wide range of molecules. Briefly, in LC-MS<sup>2</sup>, molecules are first separated by their different physicochemical interactions between the mobile and stationary phase of the LC, resulting in retention time (RT) differences. Subsequently, separation happens according to their mass-to-charge ratio ( $m/z$ ) in a mass analyzer (MS<sup>1</sup>). Finally, the molecular ions are isolated and fragmented in the tandem mass spectrometer (MS<sup>2</sup>), typically using a narrow mass window. For each ion, the recorded fragments and their intensities constitute what is called the MS<sup>2</sup> spectrum. In an untargeted LC-MS<sup>2</sup> workflow, large sets of MS features (MS<sup>1</sup>, MS<sup>2</sup>, RT), arise from a single sample. The goal in structural annotation is to associate each feature with a candidate molecular structure, for further downstream interpretation.

In recent years, many powerful methods [5, 6] to predict molecular structure annotations for MS<sup>2</sup> spectra have been developed [7–18]. In general, these methods find candidate molecular structures potentially associated with the MS feature, for example, by querying molecules with a certain mass from a structure database (DB) such as HMDB [19] or PubChem [20] and, subsequently, compute a matching score between each candidate and the MS<sup>2</sup> spectrum. The highest scoring candidate is typically considered as the structure annotation of a given MS<sup>2</sup>. However,

40 even the best-of-class methods only reach an annotation accuracy of around 40% [17] in evalua-  
41 tion when searching large candidate sets like PubChem, and therefore, in practice, a *ranked list*  
42 of molecular structures is provided to the user (e.g. top 20 structures).

43 Even though readily available in all LC-MS<sup>2</sup> pipelines and recognized as valuable informa-  
44 tion [21, 22], RT remains underutilized in automated approaches for structure annotation based  
45 on MS<sup>2</sup>. For example, only one of the above mentioned tools provides functionality to use the RT  
46 information, namely MetFrag [11]. An explaining factor for this is that RT not only depends on the  
47 molecular structure, but also the LC conditions (e.g., mobile phase composition, column pressure,  
48 etc.) [23, 24]. Thus, a molecule generally has different RTs under different LC conditions and in  
49 different laboratories [24]. Typically, the RT information is used as post-processing for candidate  
50 lists, e.g., by comparing measured and reference standard RTs [3, 24]. This approach, however, is  
51 limited by the availability of experimentally determined RTs of reference standards. RT prediction  
52 models [25, 24], on the other hand, allow to predict RTs solely based on the candidates’ molecular  
53 structure and have been successfully applied to aid structure annotation [26–29]. However, such  
54 prediction models generally have to be calibrated to the target LC configuration [3]. Calibration  
55 requires at least some amount of target LC reference RT data to be available [21, 30, 29].

56 Recently, the idea of predicting retention *orders* (RO), *i.e.*, the order in which two molecules  
57 elute from the LC column, has been explored [31–34]. ROs are largely preserved within a family of  
58 LC systems (e.g. reversed phase or HILIC). Therefore, RO predictors can be trained using a diverse  
59 set of RT reference datasets and applied to out-of-dataset LC setups with high accuracy [31].  
60 Integration of RO and MS<sup>2</sup> based scores using probabilistic graphical models was shown to improve  
61 the annotation performance in LC-MS<sup>2</sup> experiments [34].

62 In this study we set out to provide a new perspective on jointly using MS<sup>2</sup> and RO information  
63 for the structure annotation of LC-MS<sup>2</sup> data. For that, we present a novel machine learning  
64 framework called LC-MS<sup>2</sup>Struct, which learns to optimally combine the MS<sup>2</sup> and RO information  
65 for the accurate annotation of a sequence of MS features. LC-MS<sup>2</sup>Struct relies on the Structured  
66 Support Vector Machine (SSVM) [35] and Max-margin Markov Network [36] frameworks. In  
67 contrast to the previous work by Bach et al. [34], our framework does not require a separately  
68 learned RO prediction model. Instead, it optimizes the SSVM parameters such that the score  
69 margin between correct and any other sequence of annotations is maximized, subject to a graphical  
70 model representing the pairwise ROs as edges and the candidate sets of molecular structures for  
71 each MS feature as candidate node labels. That means that LC-MS<sup>2</sup>Struct learns to optimally use  
72 the RO information in an LC-MS<sup>2</sup> experiment. We trained LC-MS<sup>2</sup>Struct on all available reversed  
73 phase LC data from MassBank (MB) [37], which we processed to extract ground-truth annotated  
74 (MS<sup>2</sup>, RT)-tuples covering a diverse set of LC and MS configurations. In our experiments we  
75 evaluate LC-MS<sup>2</sup>Struct across all subsets of homogeneous LC-MS<sup>2</sup> configurations and compare  
76 it with three other previously proposed approaches: RT filtering, log $P$  predictions [11], and RO  
77 predictions [34]. Our framework can be combined with any MS<sup>2</sup> scorer and applied to new LC-MS<sup>2</sup>  
78 data, including new LC conditions without re-training, and is demonstrated below with CFM-ID  
79 [9, 18], MetFrag [11] and SIRIUS [8, 17].

## 80 Overview of LC-MS<sup>2</sup>Struct

81 In this section we discuss the main components of LC-MS<sup>2</sup>Struct, which are also illustrated in  
82 Figure 1. Further details can be found in the Methods section.

83 **Input and output.** As input we consider a typical data setting present in an untargeted LC-  
84 MS<sup>2</sup> based experiments, after pre-processing such as chromatographic peak picking and alignment  
85 (Figure 1a). Such data comprises a sequence of MS features, here indexed by  $\sigma$ . Each feature  
86 consists of MS<sup>1</sup> information (e.g. mass, adduct and isotope pattern), LC retention time (RT)  $t_\sigma$   
87 and an MS<sup>2</sup> spectrum  $x_\sigma$ . We assume that a set of candidate molecules  $\mathcal{C}_\sigma$  is associated with each  
88 MS feature  $\sigma$ . Such a set can be, for example, generated from a structure database (e.g. PubChem  
89 [20], ChemSpider [38] or PubChemLite [39]) based on the ion’s mass, a suspect list, or an *in silico*

90 molecule generator (e.g. SmiLib v2.0 [40, 41]). We furthermore require that for MS<sup>2</sup> spectrum  
91  $x_\sigma$ , a matching score  $\theta(x_\sigma, m)$  with its candidates  $m \in \mathcal{C}_\sigma$  is pre-computed using an in silico tool,  
92 such as CFM-ID [9, 18], MetFrag [11] or SIRIUS [8, 17]. LC-MS<sup>2</sup>Struct predicts a score for MS  
93 feature  $\sigma$  and each associated candidate  $m \in \mathcal{C}_\sigma$  based sequence of spectra  $\mathbf{x} = (x_\sigma)_{\sigma=1}^L$ , of length  
94  $L$ , and the ROs derived from the observed RTs  $\mathbf{t} = (t_\sigma)_{\sigma=1}^L$ . These scores are used to rank the  
95 molecular candidates associated with the MS features (Figure 1b).

96 **Candidate ranking using max-marginals.** We define a fully connected graph  $G = (V, E)$   
97 capturing the MS features and modelling their dependencies (Figure 1c). Each node  $\sigma \in V$  corre-  
98 sponds to a MS feature, and is associated with the pre-computed MS<sup>2</sup> matching scores  $\theta(x_\sigma, m)$   
99 between the MS<sup>2</sup> spectrum  $x_\sigma$  and all molecular candidates  $m \in \mathcal{C}_\sigma$ . The graph  $G$  contains an  
100 edge  $(\sigma, \tau) \in E$  for each MS feature *pair*. A scoring function  $F$  is defined predicting a compati-  
101 bility score between a sequence of molecular structure assignments  $\mathbf{y} = (y_\sigma)_{\sigma=1}^L$  in the label-space  
102  $\Sigma = \mathcal{C}_1 \times \dots \times \mathcal{C}_L$  and the observed data:

$$F(\mathbf{y} | \mathbf{x}, \mathbf{t}, \mathbf{w}, G) = \underbrace{\frac{1}{|V|} \sum_{\sigma \in V} \theta(x_\sigma, y_\sigma)}_{\text{Node scores: MS}^2 \text{ information}} + \underbrace{\frac{1}{|E|} \sum_{(\sigma, \tau) \in E} f((t_\sigma, t_\tau), (y_\sigma, y_\tau) | \mathbf{w})}_{\text{Edge scores: RO information}}, \quad (1)$$

103 where the function  $f$  outputs an edge score for each candidate assignment pair  $(y_\sigma, y_\tau)$  given the  
104 observed RTs  $(t_\sigma, t_\tau)$  and the derived RO (Figure 1d). The edge score expresses the agreement  
105 between the observed and the predicted RO for a candidate pair, *i.e.* if a candidate pair receives  
106 a high score it is more likely to be correct. Function  $f$  is parameterized by the vector  $\mathbf{w}$ , which is  
107 trained specifically for each MS<sup>2</sup> scorer (see next section). Using the compatibility score function  
108  $F$  (Equation (1)) we compute the max-marginals [42] for each candidate and MS features. The  
109 max-marginal score of a particular candidate  $m \in \mathcal{C}_\sigma$  and MS feature  $\sigma$  is defined as the maximum  
110 compatibility score that a candidate assignment  $\bar{\mathbf{y}} \in \Sigma$  with  $\bar{y}_\sigma = m$  can reach:

$$\mu(y_\sigma = m | \mathbf{x}, \mathbf{t}, \mathbf{w}, G) = \max_{\{\bar{\mathbf{y}} \in \Sigma : \bar{y}_\sigma = m\}} F(\bar{\mathbf{y}} | \mathbf{x}, \mathbf{t}, \mathbf{w}, G).$$

111 We use  $\mu$  to rank the molecular candidates [34]. For general graphs  $G$  the max-marginal inference  
112 problem (MMAP) is intractable in practice due to the exponential size of the label space  $\Sigma$ .  
113 Therefore, we approximate the MMAP problem by performing the inference on tree-like graphs  $T_k$   
114 randomly sampled from  $G$  (Figure 1c), for which exact inference is feasible [42, 43]. Subsequently,  
115 we average the max-marginal scores  $\mu(y_\sigma = m | \mathbf{x}_i, \mathbf{t}_i, \mathbf{w}_k, T_k)$  over a set of trees  $\mathbf{T}$ , an approach  
116 that performed well for practical applications [44, 45, 34]. For each spanning tree  $T_k$ , we apply a  
117 separately trained SSVM model  $\mathbf{w}_k$  to increase the diversity of the predictions.

118 **Joint annotation using Structured Support Vector Machines (SSVM).** We propose to  
119 tackle the joint assignment of candidate labels  $\mathbf{y} \in \Sigma$  to the sequence of MS features of a LC-  
120 MS<sup>2</sup> experiment through structured prediction, a family of machine learning methods generally  
121 used to annotate sequences or networks [35, 46, 45]. In our model, the structure is given by  
122 the observed RO of the MS feature pairs  $(y_\sigma, y_\tau)$ , which provides additional information on the  
123 correct candidate labels  $y_\sigma$  and  $y_\tau$ . Given a set of annotated LC-MS<sup>2</sup> experiments extracted from  
124 MassBank [37] (Figure 1e), we train a Structured Support Vector Machine (SSVM) [35] model  $\mathbf{w}$   
125 predicting the edge scores. SSVMs models can be optimized using the max-margin principle [35].  
126 In a nutshell, given a set of ground truth annotated MS feature sequences, the model parameters  
127  $\mathbf{w}$  are optimized such that the correct label sequence  $\mathbf{y}_i \in \Sigma_i$ , that is the structure annotations for  
128 all MS features in an LC-MS<sup>2</sup> experiment, scores higher than any other possible label sequence  
129 assignment  $\mathbf{y} \in \Sigma_i$  (Figure 1f).

## 130 Results

131 This section describes our experiments and the corresponding results with LC-MS<sup>2</sup>Struct. We  
132 start with a description of the training and evaluation data extracted from MassBank. Then, we  
133 continue with a comparison of LC-MS<sup>2</sup>Struct to other approaches for MS<sup>2</sup> and RT or RO score  
134 integration. Subsequently, we go into more details by analysing the performance of LC-MS<sup>2</sup>Struct  
135 for different molecular classes. We conclude with a study of our method applied for the ranking  
136 of candidate sets including stereoisomers.

137 **Extracting training data from MassBank.** For this study we extracted ground truth an-  
138 notated MS<sup>2</sup> spectra and RTs from MassBank [37], a public online database for MS<sup>2</sup> data. Each  
139 individual MassBank record typically provides a rich set of meta information (see Extended Data),  
140 such as the chromatographic and MS conditions as well as molecular structure annotations. To  
141 train the SSVM model of LC-MS<sup>2</sup>Struct, we need sets of MS features, *i.e.* (MS<sup>2</sup>, RT)-tuples, with  
142 ground truth structure annotations as available in MassBank. We process the MassBank data  
143 such that the experimental conditions are consistent *within* each MS feature set. That means,  
144 for example, that the LC setup is identical, such that we can compare the RTs within the set to  
145 derive the ROs, or that the same MS configuration was used, as we would assume in a typical  
146 LC-MS<sup>2</sup> experiment. We developed a Python package “massbank2db” [47] that can process Mass-  
147 Bank records and groups them into consistent MS feature sets, which we denote as MB-subsets.  
148 For the SSVM training and the evaluation of LC-MS<sup>2</sup>Struct, as well as comparison methods, we  
149 sample sequences of MS features to simulate LC-MS<sup>2</sup> experiments in which we measure the sig-  
150 nal of multiple unknown compounds under consistent experimental setups. Figure 1e illustrates  
151 the grouping and LC-MS<sup>2</sup> sampling process. Two collections of MassBank data were considered:  
152 ALLDATA and the ONLYSTEREO subset. Further details can be found in the Methods section.

153 **Comparison of LC-MS<sup>2</sup>Struct with other approaches.** In the first set of experiments we  
154 compare LC-MS<sup>2</sup>Struct with previous approaches for candidate ranking either using only MS<sup>2</sup>  
155 or additionally RT or RO information: *Only-MS<sup>2</sup>* uses the MS<sup>2</sup> spectrum information to rank  
156 the molecular candidates and serves as baseline; *MS<sup>2</sup>+RO* [34] uses a Ranking Support Vector  
157 Machine (RankSVM) [48, 49] to predict the ROs of candidate pairs and a probabilistic inference  
158 model to combine the ROs with MS<sup>2</sup> scores; *MS<sup>2</sup>+RT* uses predicted RTs to remove false positive  
159 molecule structures from the candidate set, ordered by their MS<sup>2</sup> score, by comparing the predicted  
160 and observed RT; *MS<sup>2</sup>+logP* is an approach introduced by Ruttkies et al. [11], which uses the  
161 observed RT to predict the XLogP3 value [50] of the unknown compound and compares it with  
162 the candidates’ XLogP3 values extracted from PubChem to refine the initial ranking based on the  
163 MS<sup>2</sup> scores. A detailed description of the comparison approaches can be found in the Methods  
164 section. The RO based methods (LC-MS<sup>2</sup>Struct and MS<sup>2</sup>+RO) were trained using the RTs from  
165 all available MB-subsets, at the same time ensuring that no test molecular structure (based on  
166 InChIKey first block) was used for the model training (structure disjoint). On the other hand, for  
167 the RT based approaches (MS<sup>2</sup>+RT and MS<sup>2</sup>+logP), the RT and XLogP3 predictors were trained  
168 in a structure disjoint fashion, using only the RT data available for that respective MB-subset. For  
169 the experiment, all MB-subsets with more than 75 (MS<sup>2</sup>, RT)-tuples from the ALLDATA data  
170 setup were used, as the RT based approaches require target LC system-specific RT training data  
171 (see Extended Data). The ranking performance was computed for each LC-MS<sup>2</sup> experiment within  
172 a particular MB-subset. The molecules in the candidate sets are identified by their InChIKey first  
173 block (*i.e.* the structural skeleton). That means, there are no stereoisomers in the candidate set  
174 and the rank of the ground truth molecular structure is determined using the InChIKey first block.  
175 Each candidate ranking approach was evaluated with three state-of-the-art MS<sup>2</sup> scorers: CFM-ID  
176 4.0 [18], MetFrag [11] and SIRIUS [17]. Further details can be found in the Methods section.

177 Figure 2a shows the average ranking performance (top-k accuracy) across 350 LC-MS<sup>2</sup> ex-  
178 periments, with each encompassing about 50 (MS<sup>2</sup>, RT)-tuples (see Methods). For CFM-ID and  
179 MetFrag, LC-MS<sup>2</sup>Struct provides 3.1 and 4.5 percentage unit increases over the Only-MS<sup>2</sup> for

180 the top-1 accuracy, corresponding to 53.5% and 66.1% performance gain. In our setting, that  
181 translates to 1.6 respectively 2.3 additional identifications at the top rank (out of approx. 50).  
182 The performance improvement increases for larger  $k$ , reaching as far as 7.2 and 8.6 percentage  
183 units at top-20, which means 3.6 respectively 4.3 additional correct structures in the top-20. For  
184 SIRIUS, the improvements are only modest, on average around 0.5 percentage units for top-1 to  
185 top-20. The runner-up score integration method is MS<sup>2</sup>+RO, which also makes use of predicted  
186 ROs. Combined with SIRIUS, MS<sup>2</sup>+RO actually achieves the best molecule ranking performance  
187 of all considered methods. For CFM-ID and MetFrag it leads to about half of the performance  
188 gain as LC-MS<sup>2</sup>Struct. The approaches relying on RTs, either by candidate filtering (MS<sup>2</sup>+RT)  
189 or through log $P$  prediction (MS<sup>2</sup>+log $P$ ), only lead to a tiny improvement for MetFrag and CFM-  
190 ID, but none for SIRIUS, for which we even observe MS<sup>2</sup>+RT leading to a decrease in ranking  
191 performance by about 2 percentage units. An explanation for this is that the filtering approach  
192 removes on average 4.7% of the correct candidates, which leads to false negative predictions.

193 The performance gain by using either RO or RT varies between the MB-subsets that differ by  
194 their LC-MS<sup>2</sup> setup (see Supplementary Table 4) and compound class composition (see Extended  
195 Data). We illustrate these differences in Figure 2b. Applying LC-MS<sup>2</sup>Struct improves the ranking  
196 performance in almost all MB-subsets, including the SIRIUS data (some very slight decreases were  
197 observed in some SIRIUS sets). This is in stark contrast to the RT based approaches (MS<sup>2</sup>+RT and  
198 MS<sup>2</sup>+log $P$ ), which often lead to less accurate rankings, especially for SIRIUS. Furthermore, as can  
199 be seen already from the average results (Figure 2a), the benefit of LC-MS<sup>2</sup>Struct depends on the  
200 MS<sup>2</sup> base scorer. For example, the top-1 accuracy of the subsets “AC\_003” and “NA\_003” can be  
201 greatly improved for MetFrag but show little or no improvement for CFM-ID. Interestingly, both  
202 datasets are natural product toxins, which are perhaps poorly explained by the bond-disconnection  
203 approach of MetFrag (often observed for substances with many rearrangements). On the other  
204 hand, for “RP\_001” and “LQB\_000” the largest improvements can be reached for CFM-ID. The  
205 RT filtering approach (MS<sup>2</sup>+RT) performs particularly well for “LQB\_000” and “UT\_000”. These  
206 subsets are characterized by a relatively homogeneous set of molecules in terms of ClassyFire [51]  
207 super-classes (see Extended Data), encompassing mostly lipids and lipid-like molecules. Since the  
208 RT prediction models are trained using only data from the respective MB-subset, this can lead  
209 to more accurate models for subsets with less heterogeneous sets of molecules. Hence, the RT  
210 filtering could work well in such cases [26].

211 **Performance analysis of LC-MS<sup>2</sup>Struct for different compound classifications.** Our  
212 next experiment investigates how LC-MS<sup>2</sup>Struct can improve the identification across different  
213 categories in two molecule classification systems. The first system is the ClassyFire [51] taxonomy,  
214 which we use to assign molecule classes to all ground truth structures in our evaluation set. As a  
215 second classification system, we use the one provided by PubChemLite [39]. Figure 3 shows the  
216 average top-1 and top-20 accuracy improvement of LC-MS<sup>2</sup>Struct over the Only-MS<sup>2</sup> baseline for  
217 each ClassyFire super-class and PubChemLite annotation category (see Methods). For ClassyFire  
218 (Figure 3a), we observe that the ranking performance improvement for the different super-classes  
219 depends on the MS<sup>2</sup> scorer. For example, the top-1 accuracy of “Alkaloids and derivatives” can  
220 be improved by 6.7 percentage units for MetFrag, but improves only very little for CFM-ID and  
221 SIRIUS (about 1 percentage unit). The picture looks different for “Organic oxygen compounds”,  
222 for which the top-1 accuracy improves by about 4.7 percentage units when using CFM-ID, but little  
223 to no improvement is observed for the other MS<sup>2</sup> scorers. This suggests that the CFM-ID results  
224 may be improved with the inclusion of more “Organic oxygen compounds”. On the other hand, it  
225 seems that the “Alkaloids and derivatives”, “Organic acids and derivatives” and “Organic nitrogen  
226 compounds” may be less well explained by MetFrag (perhaps with more rearrangements, or less  
227 distinguishable spectra), such that the improvement from the RO approach is more apparent.

228 For the PubChemLite classification (Figure 3b) we also see that different MS<sup>2</sup> scorers benefit  
229 differently by using LC-MS<sup>2</sup>Struct. The improvement seems generally more consistent across the  
230 annotation categories, with one or two differing exceptions for MetFrag and CFM-ID. The SIRIUS  
231 performance seems unaffected, irrespective of the annotation category. Looking at the top-1

232 cases: For CFM-ID, the biggest improvement is in the “Food Related” category. For MetFrag,  
233 the category that improved the most with LC-MS<sup>2</sup>Struct was “Agrochemicals”, whereas both  
234 “Agrochemicals” and “Identification” showed the least improvement for CFM-ID. The performance  
235 was relatively consistent over the other categories. For the top-20 cases, the performance seems  
236 relatively consistent except for the “Food related” (as for top-1) and “noClassification” cases.  
237 The low performance gain achieved by LC-MS<sup>2</sup>Struct for molecules not covered in PubChemLite  
238 (“noClassification”) could be due to the fact that one third of the “noClassification” molecules  
239 belong to the ClassyFire class “Glycerophospholipids”. As shown in Extended Data Figure 6, this  
240 class does not benefit from LC-MS<sup>2</sup>Struct, unlike other lipid classes also shown in that figure.

241 **Annotation of stereoisomers.** In general, MS<sup>2</sup> alone cannot reliably distinguish between  
242 stereoisomers [5, 24]. Thus MS<sup>2</sup> scorers mostly output the same matching score between spectrum  
243 and candidate molecule for different stereoisomers (*c.f.* [7, 17]). However, there is a difference be-  
244 tween stereoisomers that vary in their double-bond orientation (*e.g.* *cis-trans* or *E-Z* isomerism),  
245 which may have different shapes and thus exhibit different fragmentation and/or interactions with  
246 the LC system in some cases (see Figure 5a), compared with stereoisomers involving chiral centres  
247 (*e.g.* *R, S* isomers), which may not exhibit such dramatic differences in regular LC-MS<sup>2</sup> experi-  
248 ments. Thus, in our last experiment we study whether LC-MS<sup>2</sup>Struct can annotate stereoisomers  
249 more accurately than MS<sup>2</sup> alone. For that we consider candidate sets containing stereoisomers and  
250 evaluate LC-MS<sup>2</sup>Struct only using MassBank records where the ground truth structure has stereo-  
251 chemistry information provided, *i.e.* where the InChIKey second block is not “UHFFFAOYSA”  
252 (the ONLYSTEREO data setup, see Methods). The molecular candidates are represented using  
253 two different molecular fingerprint features: One that includes stereochemistry information  
254 (3D); and one that omits it (2D) (see Methods). This allows us to assess the importance of the  
255 stereochemistry encoding of features for the candidate ranking.

256 Figure 4a shows the ranking performance of LC-MS<sup>2</sup>Struct, using 2D respectively 3D finger-  
257 prints, compared with the Only-MS<sup>2</sup> baseline. It can be seen that LC-MS<sup>2</sup>Struct improves the  
258 ranking for all three MS<sup>2</sup> scorers. The improvement, however, is notably larger when using can-  
259 didate features that encode stereochemistry (3D). That demonstrates that LC-MS<sup>2</sup>Struct can use  
260 the RO information to improve the annotation of stereoisomers, but that the molecular features  
261 need to encode stereochemistry to achieve the best performance. When looking into the top-1  
262 performance of LC-MS<sup>2</sup>Struct (3D) for the individual MS<sup>2</sup> scorers, we observe an improvement by  
263 2.6, 3.8 and 3.2 percentage units for CFM-ID, MetFrag and SIRIUS, respectively. This translates  
264 to performance gains of 87.3%, 95.9% and 44.3% with about 1.5 additional structures correctly  
265 ranked at top rank (1) for all three MS<sup>2</sup> scorers. In contrast to our previous experiments, we see  
266 that LC-MS<sup>2</sup>Struct can also improve the ranking when SIRIUS is used as MS<sup>2</sup> scorer.

## 267 Discussion

268 We have presented LC-MS<sup>2</sup>Struct, a novel approach for the integration of tandem mass spectro-  
269 metric and liquid chromatography data for the structural annotation of small molecules. The  
270 method learns from the pairwise dependencies in the retention order of MS features within similar  
271 LC configurations and can generalize across different, heterogeneous LC configurations. The anno-  
272 tation accuracies are far superior to more traditional retention time (RT) filtering and log*P*-based  
273 approaches, and also markedly better than previous methods that rely on retention orders. In  
274 particular, compared to Bach et al. [34], who used a graphical model as a post-hoc integration  
275 tool of MS<sup>2</sup> scores and retention order predictions, the benefits of learning the parameters of the  
276 graphical model are clear. We note that it would in principle be possible to also train the MS<sup>2</sup>  
277 score part (the node scores) of the model, instead of relying on separate MS<sup>2</sup> scorers such as  
278 SIRIUS, MetFrag and CFM-ID. Such an approach could potentially further improve the results  
279 by learning from dependencies between MS<sup>2</sup> and RO features. However, as the MS<sup>2</sup> scorers used  
280 here are already relatively mature and well-known in the community, we have left this research  
281 line open for future efforts.

282 Most MS<sup>2</sup> scorers neglect stereochemistry, or collapse their results into one result for all  
283 stereoisomers by InChIKey first block. In our experiments, we could demonstrate that LC-  
284 MS<sup>2</sup>Struct can improve the identification of stereoisomers. The top-1 accuracy increased by 2.6  
285 to 3.8 and the top-20 by even 4.6 to 9.2 percentage units. Furthermore, we demonstrated that  
286 the encoding of stereochemical features in the molecule representation is essential to improved the  
287 identification of stereoisomers. These can be split into two general cases: those features encoding  
288 double-bond stereochemistry (SMILES: “\” and “/”) as well as the chiral centre configuration  
289 (SMILES: “@” and “@@”). Inspecting individual examples revealed that LC-MS<sup>2</sup>Struct can sepa-  
290 rate the former cases with varying double-bond stereochemistry - *i.e.* *E/Z*- and *cis/trans*-isomers  
291 (see *e.g.* Figure 5). However, we note that there were very few examples of double-bond and/or  
292 chiral isomers measured on the same LC system in our dataset, which makes it difficult to verify  
293 these initial results, or interrogate these further - until such data is publicly available. Certain  
294 stereoisomers differing only in chiral centres (*i.e.* containing “@” and “@@”) can generally only be  
295 separated using chiral column chromatography. MassBank, and hence our datasets, currently does  
296 not cover such columns. Since MassBank also contains many metabolomics (biological) datasets  
297 with primarily naturally-observed chiral forms, some of the observed improvement could also be  
298 related to biases in our dataset. In other words, certain chiral configurations might be over-  
299 represented in public databases (*i.e.* in this case MassBank), hence these are more likely to be  
300 predicted. Overall, these results suggest that LC-MS<sup>2</sup> annotation may be improved by the use of  
301 stereochemistry information, but that a selective fingerprint definition capturing only the stereo-  
302 chemistry that is relevant for non-chiral LC systems should be used or developed to investigate  
303 this further.

304 We developed a processing pipeline to extract ground truth annotated MS<sup>2</sup> spectra with RT  
305 information from MassBank. The (MS<sup>2</sup>, RT)-tuples are grouped into subsets with homogeneous  
306 MS- and LC-conditions. This enables researchers to use MassBank data in a format suitable for  
307 machine learning, and hence can facilitate the develop of novel approaches integrating MS<sup>2</sup> and RT  
308 information for structure annotation. We made the pipeline available to the research community  
309 in a separate Python package “massbank2db” [47].

## 310 Methods

311 **Notation.** We use the following notation to describe LC-MS<sup>2</sup>Struct:

|                             |                                                             |                                                 |
|-----------------------------|-------------------------------------------------------------|-------------------------------------------------|
| Sequence of spectra         | $\mathbf{x} = (x_1, \dots, x_L)$                            | with $x_\sigma \in \mathcal{X}$                 |
| Sequence of retention times | $\mathbf{t} = (t_1, \dots, t_L)$                            | with $t_\sigma \in \mathbb{R}_{\geq 0}$         |
| Sequence of candidate sets  | $\mathcal{C} = (\mathcal{C}_1, \dots, \mathcal{C}_L)$       | with $\mathcal{C}_\sigma \subseteq \mathcal{Y}$ |
| Sequence of labels          | $\mathbf{y} = (y_1, \dots, y_L) \in \Sigma$                 | with $y_\sigma \in \mathcal{Y}$                 |
| Candidate assignment space  | $\Sigma = \mathcal{C}_1 \times \dots \times \mathcal{C}_L,$ |                                                 |

313 where  $\mathcal{X}$  and  $\mathcal{Y}$  denote the MS<sup>2</sup> spectra and the molecular structure space, respectively, and  $\mathcal{C}$   
314 denotes a candidate set that is a sub-set of all possible molecular structures, and  $A \times B$  denotes  
315 cross product of two sets  $A$  and  $B$ . For the purpose of model training and evaluation, we assume  
316 a dataset with ground truth labeled MS feature sequences:  $\mathcal{D} = \{((\mathbf{x}_i, \mathbf{t}_i), \mathcal{C}_i, \mathbf{y}_i)\}_{i=1}^N$ , where  $N$   
317 denotes the total number of sequences. We use  $i, j \in \mathbb{N}_{\geq 0}$  to index MS feature sequences and  
318  $\sigma, \tau \in \mathbb{N}_{\geq 0}$  as indices for individual MS features within a sequence, *e.g.*  $x_{i\sigma}$  denotes the MS<sup>2</sup>  
319 spectrum at index  $\sigma$  in the sequence  $i$ . The length of a sequence of MS features is denoted with  $L$ .  
320 We denote the ground truth labels (candidate assignment) of sequence  $i$  with  $\mathbf{y}_i$  and any labelling  
321 with  $\mathbf{y}$ . Both,  $\mathbf{y}_i$  and  $\mathbf{y}$  are in  $\Sigma_i$ . We use  $y$  to denote the candidate label variable, whereas  
322  $m$  denotes a particular molecular structure. For example,  $y_\sigma = m$  means, that we assign the  
323 molecular structure  $m$  as label to the MS feature  $\sigma$ .

324 **Graphical model for joint annotation of MS features.** We consider the molecular annota-  
325 tion problem for the output of an LC-MS<sup>2</sup>, that means assigning a molecular structure to each MS  
326 feature, as a structured prediction problem [35, 46, 45], relying on a graphical model representation

of the sets of MS features arising from an LC-MS<sup>2</sup> experiment. For each MS feature  $\sigma$  we want to predict a label  $y_\sigma$  from a fixed and finite candidate (label) set  $\mathcal{C}_\sigma$ . We model the observed retention orders (RO) between each MS feature pair  $(\sigma, \tau)$  within an LC-MS<sup>2</sup> experiment, as pairwise dependencies of the features. We define an undirected graph  $G = (V, E)$  with the vertex set  $V$  containing a node  $\sigma$  for each MS feature and the edge set  $E$  containing an edge for each MS feature pair  $E = \{(\sigma, \tau) \mid \sigma, \tau \in V, \sigma \neq \tau\}$  (c.f. Figure 1a and c). The resulting graph is complete with an edge between all pairs of nodes. This allows us to make use of arbitrary pairwise dependencies, instead of limiting to, say, adjacent retention times. This modeling choice was previously shown to be beneficial by Bach et al. [34]. Here we extend that approach by learning from the pairwise dependencies to optimize joint annotation accuracy, which leads to markedly improved annotation accuracy.

For learning, we define a scoring function  $F$  that, given the input MS feature sequences  $(\mathbf{x}, \mathbf{t})$  and its corresponding sequence of candidate sets  $\mathcal{C}$ , computes a compatibility score between the measured data and *any* possible sequence of labels  $\mathbf{y} \in \Sigma$ :

$$F(\mathbf{y} \mid \mathbf{x}, \mathbf{t}, \mathbf{w}, G) = \frac{1}{|V|} \sum_{\sigma \in V} \theta(x_\sigma, y_\sigma) + \frac{1}{|E|} \sum_{(\sigma, \tau) \in E} \langle \mathbf{w}, \Gamma(\mathbf{t}^{\sigma\tau}, \mathbf{y}^{\sigma\tau}) \rangle, \quad (2)$$

where  $\theta : \mathcal{X} \times \mathcal{Y} \rightarrow (0, 1]$  is a function returning an MS<sup>2</sup> matching score between the spectrum  $x_\sigma$  and a candidate  $y_\sigma \in \mathcal{C}_\sigma$ ,  $\langle \cdot, \cdot \rangle$  denotes the inner product, and  $\mathbf{w}$  is a model weight vector to predict the RO matching score, based on the joint feature vector  $\Gamma : \mathbb{R}_{\geq 0} \times \mathbb{R}_{\geq 0} \times \mathcal{Y} \times \mathcal{Y} \rightarrow \mathcal{F}$  between the observed RO derived from  $\mathbf{t}^{\sigma\tau} = (t_\sigma, t_\tau)$  and a pair of molecular candidates  $\mathbf{y}^{\sigma\tau} = (y_\sigma, y_\tau)$ .

Equation (2) consists of two parts: (1) A score computed over the nodes in  $G$  capturing the MS<sup>2</sup> information; and (2) a score expressing the agreement of observed and predicted RO computed over the edge set. We assume that the node scores are pre-computed by a MS<sup>2</sup> scorer such as CFM-ID [18], MetFrag [11] or SIRIUS [17]. The node scores are normalized to  $(0, 1]$  within each candidate set  $\mathcal{C}_\sigma$ . The edge scores are predicted for each edge  $(\sigma, \tau)$  using the model  $\mathbf{w}$  and the joint-feature vector  $\Gamma$ :

$$\begin{aligned} f(\mathbf{t}^{\sigma\tau}, \mathbf{y}^{\sigma\tau} \mid \mathbf{w}) &= \langle \mathbf{w}, \Gamma(\mathbf{t}^{\sigma\tau}, \mathbf{y}^{\sigma\tau}) \rangle \\ &= \langle \mathbf{w}, \text{sign}(t_\sigma - t_\tau) (\phi(y_\sigma) - \phi(y_\tau)) \rangle \\ &= \text{sign}(t_\sigma - t_\tau) \langle \mathbf{w}, \phi(y_\sigma) - \phi(y_\tau) \rangle, \end{aligned} \quad (3)$$

with  $\phi : \mathcal{Y} \rightarrow \mathcal{F}_\mathcal{Y}$  being a function embedding a molecular structure into a feature space. The edge prediction function (3) will produce a height edge score, if the observed RO (*i.e.*  $\text{sign}(t_\sigma - t_\tau)$ ) agrees with the predicted one.

Using the compatibility score function (2) the predicted joint annotation for  $(\mathbf{x}, \mathbf{t})$  corresponds to the the highest scoring label sequence  $\hat{\mathbf{y}} \in \Sigma$ :  $\hat{\mathbf{y}} = \arg \max_{\bar{\mathbf{y}} \in \Sigma} F(\bar{\mathbf{y}} \mid \mathbf{x}, \mathbf{t}, \mathbf{w}, G)$ . In practice, however, instead of only predicting the best label sequence, it can be useful to *rank* the molecular candidates  $m \in \mathcal{C}_\sigma$  for each MS feature  $\sigma$ . That is because for state-of-the-art MS<sup>2</sup> scorers, the annotation accuracy in the top-20 candidate list is typically much higher than for the highest ranked candidate (top-1). Our framework provides candidate rankings by solving the following problem for each MS feature  $\sigma$  and  $m \in \mathcal{C}_\sigma$ :

$$\mu(y_\sigma = m \mid \mathbf{x}, \mathbf{t}, \mathbf{w}, G) = \max_{\{\bar{\mathbf{y}} \in \Sigma : \bar{y}_\sigma = m\}} F(\bar{\mathbf{y}} \mid \mathbf{x}, \mathbf{t}, \mathbf{w}, G). \quad (4)$$

Problem (4) returns a max-marginal  $\mu$  score for each candidate  $m$ . That is, the maximum compatibility score *any* label sequence  $\bar{\mathbf{y}} \in \Sigma$  with  $\bar{y}_\sigma = m$  can achieve. One can interpret Equation (2) as the log-space representation of a unnormalized Markov Random Field probability distribution over  $\mathbf{y}$  associated with an undirected graphical model  $G$  [43].

**Feasible inference using random spanning trees (RST).** For general graphs  $G$  the maximum a posterior (MAP) inference problem, that is finding the highest scoring label sequence  $\mathbf{y}$  given an MS feature sequence, is an  $\mathcal{NP}$ -hard problem [52, 53]. The max-marginals inference



(MMAP), needed for the candidate ranking, is an even harder problem which is  $\mathcal{NP}^{\text{PP}}$  complete [53]. However, efficient inference approaches have been developed. In particular, if  $G$  is tree-like, we can efficiently compute the max-marginals using dynamic programming and the max-product algorithm [42, 43]. Such tree-based approximations have shown to be successful in various practical applications [44, 45, 34].

Here, we follow the work by Bach et al. [34] and sample a set of random spanning trees (RST)  $\mathbf{T} = \{T_k\}_{k=1}^K$  from  $G$ , whereby  $K$  denotes the size of the RST sample. Each tree  $T_k$  has the same node set  $V$  as  $G$ , but and an edge set  $E(T) \subseteq E$ , with  $|E(T)| = L - 1$ , ensuring that  $T$  is a single connected component and cycle free. We follow the sampling procedure used by Bach et al. [34]. Given the RST set  $\mathbf{T}$  we compute the averaged max-marginals to rank the molecular candidates [34]:

$$\bar{\mu}(y_\sigma = m | \mathbf{x}, \mathbf{t}, \mathbf{w}, \mathbf{T}) = \frac{1}{K} \sum_{k=1}^K \left( \mu(y_\sigma = m | \mathbf{x}, \mathbf{t}, \mathbf{w}, T_k) - \max_{\bar{\mathbf{y}} \in \Sigma} F(\bar{\mathbf{y}} | \mathbf{x}, \mathbf{t}, \mathbf{w}, T_k) \right), \quad (5)$$

where we subtract the maximum compatibility score from the marginal values corresponding to the individual trees to normalize the marginals before averaging [34]. This normalization value can be efficiently computed given the max-marginals  $\mu$ . In our experiments, we train  $K$  individual models ( $\mathbf{w}_k$ ) and associate them with the trees  $T_k$  to increase the diversity.

**The Structured Support Vector Machine (SSVM) model.** To train the model parameters  $\mathbf{w}$  (see equation (2)), we implemented a variant of the Structured Support Vector Machine (SSVM) [36, 35]. Its primal optimization problem is given as [54]:

$$\begin{aligned} \min_{\mathbf{w}, \xi} \quad & \frac{1}{2} \|\mathbf{w}\|^2 + \frac{C}{N} \sum_{i=1}^N \xi_i \\ \text{st.} \quad & F(\mathbf{y}_i | \mathbf{x}_i, \mathbf{t}_i, \mathbf{w}, G_i) - F(\mathbf{y} | \mathbf{x}_i, \mathbf{t}_i, \mathbf{w}, G_i) \geq \ell(\mathbf{y}_i, \mathbf{y}) - \xi_i \\ & \forall i \in \{1, \dots, N\}, \forall \mathbf{y} \in \Sigma_i, \end{aligned} \quad (6)$$

where  $C > 0$  being the regularization parameter,  $\xi_i \geq 0$  is the slack variable for example  $i$  and  $\ell : \Sigma_i \times \Sigma_i \rightarrow \mathbb{R}_{\geq 0}$  being a function capturing the loss between two label sequences. The constraint set definition (st.) of problem (6) leads to a parameter vector  $\mathbf{w}$  that is trained according to the max-margin principle [36, 35, 46], that is the score  $F(\mathbf{y}_i)$  of the correct label should be greater than the score  $F(\mathbf{y})$  of any other label sequence by at least the specified margin  $\ell(\mathbf{y}_i, \mathbf{y})$ . Note that in the SSVM problem (6) a different graph  $G_i = (V_i, E_i)$  can be associated to each training example  $i$ , allowing, for example, to process sequences of different length.

We solve (6) in its dual formulation and use the Frank-Wolfe algorithm [55] following the recent work by Lacoste-Julien et al. [54]. In the supplementary material we derive the dual problem and demonstrate how to solve it efficiently using the Frank-Wolfe algorithm and RST approximations for  $G_i$ . Optimizing the dual problem enables us to use non-linear kernel functions  $\lambda : \mathcal{Y} \times \mathcal{Y} \rightarrow \mathbb{R}_{\geq 0}$  measuring the similarity between the molecular structures associated with the label sequences.

The label loss function  $\ell$  is defined as follows:

$$\ell(\mathbf{y}_i, \mathbf{y}) = \frac{1}{|V_i|} \sum_{\sigma=1}^L (1 - \lambda(y_{i\sigma}, y_\sigma)).$$

and satisfies  $\ell(\mathbf{y}, \mathbf{y}) = 0$  (a required property [54]), if  $\lambda$  is a normalized kernel, which holds true in our experiments (we used the MinMax kernel [56]).

**Pre-processing pipeline for raw MassBank records.** Extended Data Figure 8 illustrates our MassBank (MB) pre-processing pipeline implemented in the Python package “massbank2db” [47]. First, the MassBank records’ text files were parsed and the  $\text{MS}^2$  spectrum, ground truth annotation, RT and meta-information extracted. Records with missing  $\text{MS}^2$ , RT or annotation

405 were discarded. We use the MB 2020.11 release for our experiments. Subsequently, we grouped  
406 the MassBank records into subsets (denoted as MB-subsets) where the (MS<sup>2</sup>, RT)-tuples have  
407 been measured under the same LC- and MS-conditions. Extended Data Table 3 summarizes the  
408 grouping criteria. In the next step, we used the InChIKey [57] identifier in MassBank to retrieve  
409 the SMILES [58] representation from PubChem [20] (1st of February 2021), rather than using the  
410 contributor-supplied SMILES. This ensures that we use a single SMILES source for the molecular  
411 candidates and ground truth annotations. Before inserting the records into our final database, we  
412 performed three more filtering steps: (1) we removed records for which the ground truth exact  
413 mass deviated too much from the calculated exact mass based on the precursor mass-per-charge  
414 (m/z) and adduct type (larger than 20ppm); (2) we removed subsets that contain less than 50  
415 unique molecular structures; (3) we removed all records associated with the MassBank prefix LU  
416 that were potential isobars (see pull-request #152 in the MassBank GitHub repository, <https://github.com/MassBank/MassBank-data/pull/152>).  
417 Supplementary Table 4 summarizes the  
418 meta-information for all generated MB-subsets.

419 **Generating the molecular candidate sets.** We used SIRIUS [8, 17] to generate the molecular  
420 candidate sets. For each MassBank record the ground truth molecular formula was used by SIRIUS  
421 to collect the candidate structures from PubChem [20]. The candidate sets generated by SIRIUS  
422 contain a single stereoisomer per candidate, identified by their InChIKey first block (structural  
423 skeleton). To study the ability of LC-MS<sup>2</sup>Struct to annotate the stereochemical variant of the  
424 molecules, we enriched the SIRIUS candidates sets with stereoisomers. For that, the InChIKey  
425 first block of each candidate was used to search PubChem (1st of February 2021) for stereoisomers.  
426 The additional molecules were then added to the candidate sets.

427 **Pre-computing the MS<sup>2</sup> matching scores.** For each MB-subset, MS<sup>2</sup> spectra with identical  
428 adduct type (e.g. [M+H]<sup>+</sup>) and ground truth molecular structure were aggregated. Depending on  
429 the MS<sup>2</sup> scorer we either merged the MS<sup>2</sup> into a single spectrum (CFM-ID and MetFrag) follow-  
430 ing the strategy by Ruttkies et al. [11] or we provided the MS<sup>2</sup> spectra separately (SIRIUS). To  
431 compute the CFM-ID (v4.0.7) MS<sup>2</sup> matching score we first predicted the in silico MS<sup>2</sup> spectra  
432 for all molecular candidate structures based on their isomeric SMILES representation using the  
433 pre-trained CFM-ID models (Metlin 2019 MSML) by Wang et al. [18]. We merged the three in  
434 silico spectra predicted by CFM-ID for different collision energies and compared them with the  
435 merged MassBank spectrum using the modified cosine similarity [59] implemented in the matchms  
436 [60] (v0.9.2) Python library. For MetFrag (v2.4.5) the MS<sup>2</sup> matching scores were calculated using  
437 the **FragmenterScore** feature based on the isomeric SMILES representation of the candidates. For  
438 SIRIUS, the required fragmentation trees are computed using the ground truth molecular formula  
439 of each MassBank spectrum. SIRIUS uses canonical SMILES and hence does not encode stereo-  
440 chemical information (canonical SMILES). Therefore, we used the same SIRIUS MS<sup>2</sup> matching  
441 score for all stereoisomers sharing the same InChIKey first block. For all three MS<sup>2</sup> scorers we  
442 normalized the MS<sup>2</sup> matching scores to the range [0, 1] separately for each candidate set. For  
443 the machine learning based scorers (CFM-ID and SIRIUS) we predicted the matching scores such  
444 that the associated MassBank record’s ground truth structures was not used for the MS<sup>2</sup> scorer  
445 model training. If a MS<sup>2</sup> scorer failed on a MassBank record, we assigned a constant MS<sup>2</sup> score  
446 to each candidate.

447 **Molecular feature representations.** For LC-MS<sup>2</sup>Struct, we used extended connectivity fin-  
448 gerprints with function-classes (FCFP) [61] to represent molecular structures in our experiments.  
449 We employed RDKit (v2021.03.1) for the FCFP fingerprint generation. The fingerprints were  
450 computed based on the isomeric SMILES. RDKit parameter “useChirality” was used to gener-  
451 ate fingerprints that either encode stereochemistry (3D) or not (2D). We used *counting* FCFP  
452 fingerprints. To define the set of substructures in the fingerprint vector, we first generated all  
453 possible substructures, using a FCFP radius of two, based on a set of 50000 randomly sampled  
454 molecular candidates associated with our training data, and all the ground truth training struc-

455 tures, resulting in 6925 (3D) and 6236 (2D) substructures. We used 2D FCFP fingerprints in  
456 our experiments, except for the experiments focusing on the identification of stereoisomers, where  
457 we used 3D fingerprints. We used the MinMax-kernel [56] to compute the similarity between the  
458 molecules.

459 **Computing molecular categories.** For the analysis of the ranking performance for different  
460 molecular categories, we used two classification systems, ClassyFire [51], which classifies molecules  
461 according to their structure and PubChemLite [39], which focuses on molecules’ relevance to  
462 exposomics. For ClassyFire, we used the “classyfireR” R package to retrieve the classification  
463 for each ground truth molecular structure in our dataset. For PubChemLite classifications, we  
464 first check for each molecular structure whether it is contained in PubChemLite by matching the  
465 InChIKey first block. We considered all 10 of the provided PubChemLite classes. If a molecular  
466 structure was not found in PubChemLite we assign it to the category “noClassification”.

467 **Training and evaluation data setups.** We only considered MassBank data that has been  
468 analyzed using a LC reversed phase (RP) column. We removed molecules from the data if their  
469 measured retention time (RT) was less than three times the estimated column dead-time [62], as  
470 we considered such molecules to be non-retaining.

471 We considered two separate data setups. The first one, denoted by ALLDATA, used all avail-  
472 able MassBank data to train and evaluate LC-MS<sup>2</sup>Struct. This setup was used to compare the  
473 different candidate ranking approaches as well as to investigate the performance across various  
474 molecular classes. The second setup, denoted by ONLYSTEREO, used MassBank records where  
475 the ground truth molecular structure contains stereochemical information, *i.e.* where the InChIKey  
476 second block is not “UHFFFAOYSA”. This setup was used in the experiments regarding the ability  
477 of LC-MS<sup>2</sup>Struct to distinguish stereochemistry. In the training, we additionally used MassBank  
478 records that appear only without stereochemical information in our candidate sets, identified by  
479 the InChIKey second block equal to “UHFFFAOYSA” in PubChem. The number of available  
480 training and evaluation (MS<sup>2</sup>, RT)-tuples per MB-subset are summarized in Extended Data Ta-  
481 ble 1.

482 For each MB-subset we sampled a set of LC-MS<sup>2</sup> experiments, *i.e.* (MS<sup>2</sup>, RT)-tuple sequences,  
483 from the available evaluation data. The number of LC-MS<sup>2</sup> experiments ( $n$  below) depended on  
484 the number of available (MS<sup>2</sup>, RT)-tuples (see Extended Data Table 1) as follows

$$n = \begin{cases} 0 & \text{if } |\mathcal{D}| < 30 \\ 1 & \text{if } |\mathcal{D}| \leq 75 \\ 15 & \text{if } |\mathcal{D}| \leq 250 \\ \lfloor \frac{|\mathcal{D}|}{50} \rfloor & \text{else.} \end{cases}$$

485 where  $\mathcal{D}$  is a set of (MS<sup>2</sup>, RT)-tuples with ground truth annotation and molecular candidate  
486 sets associated with a MB-subset. If there are less than 30 (MS<sup>2</sup>, RT)-tuples available, we do not  
487 generate an evaluation LC-MS<sup>2</sup> experiment from the corresponding MB-subset. Based on this sam-  
488 pling scheme, we obtained 354 and 94 LC-MS<sup>2</sup> experiments for ALLDATA and ONLYSTEREO,  
489 respectively, for our evaluation (see Extended Data Table 1).

490 We trained eight ( $K = 8$ ) separate SSVM models  $\mathbf{w}_k$  for each evaluation LC-MS<sup>2</sup> experiment.  
491 For each SSVM model we first generated a set containing the (MS<sup>2</sup>, RT)-tuples from all MB-  
492 subsets. Then, we removed all tuples whose ground truth molecular structure, determined by the  
493 InChIKey first block, was in the respective evaluation LC-MS<sup>2</sup> experiment. Lastly, we randomly  
494 sampled LC-MS<sup>2</sup> experiments from the training tuples, within their respective MB-subset, with a  
495 length randomly chosen from  $\{4, \dots, 32\}$  (see also Figure 1e) and an RST  $T_{ik}$  assigned for each  
496 MS feature sequence  $i$ . In total 768 LC-MS<sup>2</sup> training experiments were generated for each SSVM  
497 model. To speed up the model training, we restricted the candidate set size  $|\mathcal{C}_{i\sigma}|$  of each training  
498 MS feature  $\sigma$  to maximum 75 candidate structures by random sub-sampling. Each SSVM model  
499  $\mathbf{w}_k$  was applied to the evaluation LC-MS<sup>2</sup> experiment, associated with different RSTs  $T_k$ , and the

500 averaged max-marginal scores were used for the final candidate ranking (see Equation (5) and  
501 Figure 1c).

502 **SSVM hyper-parameter optimization.** The SSVM regularization parameter  $C$  was opti-  
503 mized for each training set separately using grid search and evaluation on a random validation  
504 set sampled from the training data’s (MS<sup>2</sup>, RT)-tuples (33%). A set of LC-MS<sup>2</sup> experiments was  
505 generated from the validation set and used to determine the Normalized Discounted Cumulative  
506 Gain (NDCG) [63] for each  $C$  value. The regularization parameter with the highest NDCG value  
507 was chosen to train the final model. We used the scikit-learn [64] (v0.24.1) Python package to  
508 compute the NDCG value, taking into account ranks up until 10 (NDCG@10) and defined the  
509 relevance for each candidate to be 1 if it is the correct one and 0 otherwise. To reduce the training  
510 time, we searched the optimal  $C^*$  only for SSVM model  $k = 0$  and used  $C^*$  for the other models  
511 with  $k > 0$ .

512 **Ranking performance evaluation.** We computed the ranking performance (top-k accuracy)  
513 for a given LC-MS<sup>2</sup> experiment using the tie-breaking strategy described in [8]: If a ranking  
514 method assigns an identical score to a set of  $n$  molecular candidates, then all accuracies at the  
515 ordinal ranks  $k$  at which one of these candidates is found are increased by  $\frac{1}{n}$ . We computed a  
516 candidate score (*i.e.* Only-MS<sup>2</sup>, LC-MS<sup>2</sup>Struct, etc.) for each molecular structure in the candidate  
517 set. In the experiments using the ALLDATA setup we collapsed the candidates by InChIKey first  
518 block, assigning the maximum candidate score for each InChIKey first block group. The top-k  
519 accuracy was computed based on the collapsed candidate sets. In the ONLYSTEREO setup, we  
520 did not collapse the candidate sets before the top- $k$  accuracy computation.

521 For the performance analysis of individual molecule categories, either ClassyFire [51] or Pub-  
522 ChemLite [39] classes, we first computed the rank of the correct molecular structure for each  
523 (MS<sup>2</sup>, RT)-tuple of each LC-MS<sup>2</sup> evaluation experiment based on Only-MS<sup>2</sup> and LC-MS<sup>2</sup>Struct  
524 scores. Subsequently, we computed the top-k accuracy for each molecule category, associated with  
525 at least 50 unique ground truth molecular structures (based on InChIKey first block). As a ground  
526 truth structure can appear multiple times in our dataset, we generate 50 random samples, each  
527 containing only one example per unique structure, and computed the averaged top-k accuracy.

528 **Comparison of LC-MS<sup>2</sup>Struct with other approaches.** We compared LC-MS<sup>2</sup>Struct with  
529 three different approaches to integrate tandem mass spectrum (MS<sup>2</sup>) and retention time (RT)  
530 information, namely RT filtering, log $P$  prediction and retention order prediction.

531 For RT filtering (MS<sup>2</sup>+RT), we followed Aicheler et al. [26] who used the relative error  $\epsilon =$   
532  $\frac{|\hat{t}-t_\sigma|}{t_\sigma}$ , between the predicted ( $\hat{t}$ ) and observed ( $t_\sigma$ ) retention time. We set the filtering threshold  
533 to the 95%-quantile of the relative RT prediction errors estimated from the RT model’s training  
534 data, following [27, 29]. We used scikit-learn’s [64] (v0.24.1) implementation of the Support Vector  
535 Regression (SVR) [65] with radial basis function (RBF) kernel for the RT prediction. For SVR,  
536 we use the same 196 features, computed using RDKit (v2021.03.1), as Bouwmeester et al. [25].

537 For log $P$  prediction (MS<sup>2</sup>+log $P$ ) we followed Ruttkies et al. [11] who assigned a weighted  
538 sum of an MS<sup>2</sup> and log $P$  score  $s = \beta \cdot s_{\text{MS}^2}(m) + (1 - \beta) s_{\text{log}P}(m)$  to each candidate  $m \in$   
539  $\mathcal{C}_\sigma$ , and use it rank the set of molecular candidates. The log $P$  score is given by  $s_{\text{log}P}(m) =$   
540  $\frac{1}{\delta\sqrt{2\pi}} \exp\left(-\frac{(\log P_m - \log P_\sigma)^2}{2\delta^2}\right)$ , where  $\log P_m$  is the predicted XLogP3 [50] extracted from PubChem  
541 [20] for candidate  $m$ , and  $\log P_\sigma = a \cdot t_\sigma + b$  is the XLogP3 value of the unknown compound,  
542 associated with MS feature  $\sigma$ , predicted based on its measured RT  $t_\sigma$ . The parameters  $a$  and  $b$   
543 of the linear regression model were determined using a set of RT and XLogP3 tuples associated  
544 with the LC system. As Ruttkies et al. [11], we set the  $\delta = 1.5$  and set  $\beta$  such that it optimizes  
545 the top-1 candidate ranking accuracy, calculated from a set of 25 randomly generated training  
546 LC-MS<sup>2</sup> experiments.

547 For retention order prediction (MS<sup>2</sup>+RO) we used the approach by Bach et al. [34] which relies  
548 on a Ranking Support Vector Machine (RankSVM) implementation in the Python library ROSVM

549 [31, 66] (v0.4.0). We used counting `substructure` fingerprints calculated using CDK (v2.5) [67]  
550 and the MinMax kernel [56]. The MS<sup>2</sup> matching scores and predicted ROs were used to compute  
551 max-marginal ranking scores using the framework by Bach et al. [34]. We used the author’s  
552 implementation in version 0.2.3 [68]. The hyper-parameters  $\beta$  and  $k$  of the model were optimized  
553 for each evaluation LC-MS<sup>2</sup> experiment separately using the respective training data. To estimate  
554  $\beta$  we generated 25 LC-MS<sup>2</sup> experiments from the training data and selected the  $\beta$  that maximized  
555 the Top20AUC [34] ranking performance. The sigmoid parameter  $k$  was estimated using Platt’s  
556 method [69] calibrated using RankSVM’s training data. We used 128 random spanning trees per  
557 evaluation LC-MS<sup>2</sup> experiment to compute the averaged max-marginals.

558 For the experiments comparing the different methods we used all LC-MS<sup>2</sup> experiments gener-  
559 ated, except the ones from the MB-subsets “CE\_001”, “ET\_002”, “KW\_000” and “RP\_000” (see  
560 Extended Data Table 1). For those subsets the evaluation LC-MS<sup>2</sup> experiment contain all avail-  
561 able (MS<sup>2</sup>, RT)-tuples, leaving no LC system specific data to train the RT (MS<sup>2</sup>+RT) or log $P$   
562 (MS<sup>2</sup>+log $P$ ) prediction models. The RT and log $P$  prediction models are trained in a structure  
563 disjoint fashion using the RT data of the particular MB-subset associated with the evaluation  
564 LC-MS<sup>2</sup>. The RO prediction model used by MS<sup>2</sup>+RO is trained structure disjoint as well, but  
565 using the RTs of all MB-subsets.

## 566 Data availability

567 All data used in our experiments is available online (<https://zenodo.org/record/5854661>).  
568 The candidate rankings of all LC-MS<sup>2</sup> experiments are available online: ALLDATA (<https://zenodo.org/record/6036208>) and ONLYSTEREO (<https://zenodo.org/record/6037629>).

## 570 Code availability

571 The source code developed for this study is available on GitHub: Structure Support Vector Ma-  
572 chine (SSVM) implementation ([https://github.com/aalto-ics-kepaco/msms\\_rt\\_ssvm](https://github.com/aalto-ics-kepaco/msms_rt_ssvm)); scripts  
573 to run the experiments ([https://github.com/aalto-ics-kepaco/lcms2struct\\_exp](https://github.com/aalto-ics-kepaco/lcms2struct_exp)); and, the  
574 library implementing the MassBank pre-processing (<https://github.com/bachi55/massbank2db>).  
575 The candidate fingerprints were computed by the ROSVM Python library [66] (v0.4.0, <https://github.com/bachi55/rosvm>) using the RDKit (2021.03.1) in the backend. The SSVM li-  
576 brary uses the max-marginal inference solver implemented by Bach et al. [34] (v0.2.3, [https://github.com/aalto-ics-kepaco/msms\\_rt\\_score\\_integration](https://github.com/aalto-ics-kepaco/msms_rt_score_integration)).

## 579 References

- 580 [1] Ricardo R. da Silva et al. “Illuminating the dark matter in metabolomics”. In: *Proceedings*  
581 *of the National Academy of Sciences* 112.41 (2015), pp. 12549–12550. ISSN: 0027-8424. DOI:  
582 10.1073/pnas.1516878112. eprint: [https://www.pnas.org/content/112/41/12549.](https://www.pnas.org/content/112/41/12549.full.pdf)  
583 [full.pdf](https://www.pnas.org/content/112/41/12549.full.pdf). URL: <https://www.pnas.org/content/112/41/12549>.
- 584 [2] Alexander A. Aksenov et al. “Global chemical analysis of biology by mass spectrometry”.  
585 In: *Nature Reviews Chemistry* 1.7 (2017), p. 0054. ISSN: 2397-3358. DOI: 10.1038/s41570-  
586 017-0054. URL: <https://doi.org/10.1038/s41570-017-0054>.
- 587 [3] Ivana Blaženović et al. “Structure annotation of all mass spectra in untargeted metabolomics”.  
588 In: *Analytical chemistry* 91.3 (2019), pp. 2155–2162.
- 589 [4] Ivana Blaženović et al. “Software Tools and Approaches for Compound Identification of LC-  
590 MS/MS Data in Metabolomics”. In: *Metabolites* 8.2 (2018). ISSN: 2218-1989. DOI: 10.3390/  
591 [metabo8020031](https://www.mdpi.com/2218-1989/8/2/31). URL: <https://www.mdpi.com/2218-1989/8/2/31>.

- 592 [5] Emma L. Schymanski et al. “Critical Assessment of Small Molecule Identification 2016:  
593 automated methods”. In: *Journal of Cheminformatics* 9.1 (Mar. 2017), p. 22. ISSN: 1758-  
594 2946. DOI: 10.1186/s13321-017-0207-1. URL: <https://doi.org/10.1186/s13321-017-0207-1>.  
595
- 596 [6] Dai Hai Nguyen et al. “Recent advances and prospects of computational methods for metabo-  
597 lite identification: a review with emphasis on machine learning approaches”. In: *Briefings*  
598 *in Bioinformatics* 20.6 (Aug. 2018), pp. 2028–2043. ISSN: 1477-4054. DOI: 10.1093/bib/  
599 bby066. eprint: [https://academic.oup.com/bib/article-pdf/20/6/2028/31789414/  
600 bby066.pdf](https://academic.oup.com/bib/article-pdf/20/6/2028/31789414/bby066.pdf). URL: <https://doi.org/10.1093/bib/bby066>.
- 601 [7] Sebastian Wolf et al. “In silico fragmentation for computer assisted identification of metabo-  
602 lite mass spectra”. In: *BMC Bioinformatics* 11.1 (2010), pp. 1–12. ISSN: 1471-2105.
- 603 [8] Kai Dührkop et al. “Searching molecular structure databases with tandem mass spectra  
604 using CSI:FingerID”. In: *Proceedings of the National Academy of Sciences (PNAS)* (2015).  
605 eprint: <http://www.pnas.org/content/early/2015/09/16/1509788112.full.pdf>. URL:  
606 <http://www.pnas.org/content/early/2015/09/16/1509788112.abstract>.
- 607 [9] Felicity Allen et al. “Competitive fragmentation modeling of ESI-MS/MS spectra for puta-  
608 tive metabolite identification”. In: *Metabolomics* 11.1 (2015), pp. 98–110. ISSN: 1573-3882.  
609 URL: <http://dx.doi.org/10.1007/s11306-014-0676-4>.
- 610 [10] Céline Brouard et al. “Fast metabolite identification with Input Output Kernel Regression”.  
611 In: *Bioinformatics* 32.12 (2016), pp. i28–i36.
- 612 [11] Christoph Ruttkies et al. “MetFrag relaunched: incorporating strategies beyond in silico  
613 fragmentation”. In: *Journal of Cheminformatics* 8.1 (Jan. 2016), p. 3. ISSN: 1758-2946. DOI:  
614 10.1186/s13321-016-0115-9. URL: <https://doi.org/10.1186/s13321-016-0115-9>.
- 615 [12] Céline Brouard et al. “Magnitude-Preserving Ranking for Structured Outputs”. In: *Proceed-*  
616 *ings of the Ninth Asian Conference on Machine Learning*. Ed. by Min-Ling Zhang et al.  
617 Vol. 77. Proceedings of Machine Learning Research. PMLR, 15–17 Nov 2017, pp. 407–422.  
618 URL: <http://proceedings.mlr.press/v77/brouard17a.html>.
- 619 [13] Dai Hai Nguyen et al. “SIMPLE: Sparse Interaction Model over Peaks of moLEcules for fast,  
620 interpretable metabolite identification from tandem mass spectra”. In: *Bioinformatics* 34.13  
621 (2018), pp. i323–i332. DOI: 10.1093/bioinformatics/bty252. eprint: [/oup/backfile/  
622 content\\_public/journal/bioinformatics/34/13/10.1093\\_bioinformatics\\_bty252/1/  
623 bty252.pdf](https://academic.oup.com/bioinformatics/article-pdf/34/13/10.1093_bioinformatics_bty252/1/bty252.pdf). URL: <http://dx.doi.org/10.1093/bioinformatics/bty252>.
- 624 [14] Yuanyue Li et al. “Identification of metabolites from tandem mass spectra with a ma-  
625 chine learning approach utilizing structural features”. In: *Bioinformatics* 36.4 (Oct. 2019),  
626 pp. 1213–1218. ISSN: 1367-4803. DOI: 10.1093/bioinformatics/btz736. URL: <https://doi.org/10.1093/bioinformatics/btz736>.  
627
- 628 [15] Christoph Ruttkies et al. “Improving MetFrag with statistical learning of fragment annota-  
629 tions”. In: *BMC bioinformatics* 20.1 (2019), p. 376.
- 630 [16] Dai Hai Nguyen et al. “ADAPTIVE: leArning DAta-dePendenT, concIse molecular VEctors  
631 for fast, accurate metabolite identification from tandem mass spectra”. In: *Bioinformatics*  
632 35.14 (July 2019), pp. i164–i172. ISSN: 1367-4803. DOI: 10.1093/bioinformatics/btz319.  
633 eprint: [https://academic.oup.com/bioinformatics/article-pdf/35/14/i164/  
634 28913118/btz319.pdf](https://academic.oup.com/bioinformatics/article-pdf/35/14/i164/28913118/btz319.pdf). URL: <https://doi.org/10.1093/bioinformatics/btz319>.
- 635 [17] Kai Dührkop et al. “SIRIUS 4: a rapid tool for turning tandem mass spectra into metabolite  
636 structure information”. In: *Nat Methods* (2019). Doi 10.1038/s41592-019-0344-8. DOI: 10.  
637 1038/s41592-019-0344-8.
- 638 [18] Fei Wang et al. “CFM-ID 4.0: More Accurate ESI-MS/MS Spectral Prediction and Com-  
639 pound Identification”. In: *Analytical Chemistry* 0.0 (2021). PMID: 34403256, null. DOI:  
640 10.1021/acs.analchem.1c01465. eprint: [https://doi.org/10.1021/acs.analchem.  
641 1c01465](https://doi.org/10.1021/acs.analchem.1c01465). URL: <https://doi.org/10.1021/acs.analchem.1c01465>.

- 642 [19] David S Wishart et al. “HMDB 4.0: the human metabolome database for 2018”. In: *Nucleic*  
643 *Acids Research* 46.D1 (Nov. 2017), pp. D608–D617. ISSN: 0305-1048. DOI: 10.1093/nar/  
644 gkx1089. eprint: [https://academic.oup.com/nar/article-pdf/46/D1/D608/23162277/  
645 gkx1089.pdf](https://academic.oup.com/nar/article-pdf/46/D1/D608/23162277/gkx1089.pdf). URL: <https://doi.org/10.1093/nar/gkx1089>.
- 646 [20] Sunghwan Kim et al. “PubChem in 2021: new data content and improved web interfaces”.  
647 In: *Nucleic Acids Research* 49.D1 (Nov. 2020), pp. D1388–D1395. ISSN: 0305-1048. DOI:  
648 10.1093/nar/gkaa971. eprint: [https://academic.oup.com/nar/article-pdf/49/D1/  
649 D1388/35363961/gkaa971.pdf](https://academic.oup.com/nar/article-pdf/49/D1/D1388/35363961/gkaa971.pdf). URL: <https://doi.org/10.1093/nar/gkaa971>.
- 650 [21] Jan Stanstrup et al. “PredRet: Prediction of Retention Time by Direct Mapping between  
651 Multiple Chromatographic Systems”. In: *Analytical Chemistry* 87.18 (2015). PMID: 26289378,  
652 pp. 9421–9428. URL: <http://dx.doi.org/10.1021/acs.analchem.5b02287>.
- 653 [22] Dorrain Yanwen Low et al. “Data sharing in PredRet for accurate prediction of reten-  
654 tion time: Application to plant food bioactive compounds”. In: *Food Chemistry* 357 (2021),  
655 p. 129757. ISSN: 0308-8146. DOI: <https://doi.org/10.1016/j.foodchem.2021.129757>.  
656 URL: <https://www.sciencedirect.com/science/article/pii/S0308814621007639>.
- 657 [23] S. Fanali et al. *Liquid Chromatography: Fundamentals and Instrumentation*. Handbooks in  
658 Separation Science. Elsevier Science, 2013. ISBN: 9780124158672.
- 659 [24] Michael Witting et al. “Current status of retention time prediction in metabolite identifica-  
660 tion”. In: *Journal of Separation Science* 43.9-10 (2020), pp. 1746–1754. DOI: 10.1002/  
661 jssc.202000060. eprint: [https://onlinelibrary.wiley.com/doi/pdf/10.1002/  
662 jssc.202000060](https://onlinelibrary.wiley.com/doi/pdf/10.1002/jssc.202000060). URL: [https://onlinelibrary.wiley.com/doi/abs/10.1002/jssc.  
663 202000060](https://onlinelibrary.wiley.com/doi/abs/10.1002/jssc.202000060).
- 664 [25] Robbin Bouwmeester et al. “Comprehensive and empirical evaluation of machine learning  
665 algorithms for small molecule LC retention time prediction”. In: *Analytical chemistry* 91.5  
666 (2019), pp. 3694–3703.
- 667 [26] Fabian Aicheler et al. “Retention Time Prediction Improves Identification in Nontargeted  
668 Lipidomics Approaches”. In: *Analytical chemistry* 87.15 (2015), pp. 7698–7704.
- 669 [27] Milinda A Samaraweera et al. “Evaluation of an Artificial Neural Network Retention Index  
670 Model for Chemical Structure Identification in Nontargeted Metabolomics”. In: *Analytical*  
671 *chemistry* 90.21 (2018), pp. 12752–12760.
- 672 [28] Paolo Bonini et al. “Retip: Retention Time Prediction for Compound Annotation in Un-  
673 targeted Metabolomics”. In: *Analytical Chemistry* 0.0 (2020). PMID: 32390414, null. DOI:  
674 10.1021/acs.analchem.9b05765. eprint: [https://doi.org/10.1021/acs.analchem.  
675 9b05765](https://doi.org/10.1021/acs.analchem.9b05765). URL: <https://doi.org/10.1021/acs.analchem.9b05765>.
- 676 [29] Qiong Yang et al. “Prediction of Liquid Chromatographic Retention Time with Graph Neural  
677 Networks to Assist in Small Molecule Identification”. In: *Anal. Chem.* (Jan. 2021). ISSN:  
678 0003-2700. DOI: 10.1021/acs.analchem.0c04071. URL: [https://doi.org/10.1021/acs.  
679 analchem.0c04071](https://doi.org/10.1021/acs.analchem.0c04071).
- 680 [30] Robbin Bouwmeester et al. “Generalized Calibration Across Liquid Chromatography Setups  
681 for Generic Prediction of Small-Molecule Retention Times”. In: *Analytical Chemistry* 92.9  
682 (2020). PMID: 32281370, pp. 6571–6578. DOI: 10.1021/acs.analchem.0c00233. eprint:  
683 <https://doi.org/10.1021/acs.analchem.0c00233>. URL: [https://doi.org/10.1021/  
684 acs.analchem.0c00233](https://doi.org/10.1021/acs.analchem.0c00233).
- 685 [31] Eric Bach et al. “Liquid-chromatography retention order prediction for metabolite identi-  
686 fication”. In: *Bioinformatics* 34.17 (2018), pp. i875–i883. DOI: 10.1093/bioinformatics/  
687 bty590. eprint: [/oup/backfile/content\\_public/journal/bioinformatics/34/17/10.  
688 1093\\_bioinformatics\\_bty590/2/bty590.pdf](https://academic.oup.com/bioinformatics/article-pdf/34/17/10.1093_bioinformatics_bty590/2/bty590.pdf). URL: [http://dx.doi.org/10.1093/  
689 bioinformatics/bty590](http://dx.doi.org/10.1093/bioinformatics/bty590).

- 690 [32] J Jay Liu et al. “Quantitative Structure–Retention Relationships with Non-Linear Pro-  
691 gramming for Prediction of Chromatographic Elution Order”. In: *International journal of*  
692 *molecular sciences* 20.14 (2019), p. 3443.
- 693 [33] Petar Žuvela et al. “Prediction of Chromatographic Elution Order of Analytical Mixtures  
694 Based on Quantitative Structure-Retention Relationships and Multi-Objective Optimiza-  
695 tion”. In: *Molecules* 25.13 (2020), p. 3085.
- 696 [34] Eric Bach et al. “Probabilistic framework for integration of mass spectrum and retention  
697 time information in small molecule identification”. In: *Bioinformatics* (Nov. 2020). btaa998.  
698 ISSN: 1367-4803. DOI: 10.1093/bioinformatics/btaa998. eprint: <https://academic.oup.com/bioinformatics/advance-article-pdf/doi/10.1093/bioinformatics/btaa998/34899743/btaa998.pdf>. URL: <https://doi.org/10.1093/bioinformatics/btaa998>.
- 701 [35] I Tsochantaridis et al. “Large margin methods for structured and interdependent output  
702 variables”. In: *Journal of Machine Learning Research (JMLR)* 6 (2005).
- 703 [36] Ben Taskar et al. “Max-Margin Markov Networks”. In: *Advances in Neural Information*  
704 *Processing Systems 16*. Ed. by S. Thrun et al. MIT Press, 2004, pp. 25–32. URL: <http://papers.nips.cc/paper/2397-max-margin-markov-networks.pdf>.
- 706 [37] Hisayuki Horai et al. “MassBank: a public repository for sharing mass spectral data for life  
707 sciences”. In: *Journal of mass spectrometry* 45.7 (2010), pp. 703–714.
- 708 [38] Harry Pence et al. “ChemSpider: An Online Chemical Information Resource”. In: *Journal*  
709 *of Chemical Education* 87 (Aug. 2010). DOI: 10.1021/ed100697w.
- 710 [39] Emma Louise Schymanski et al. “Empowering Large Chemical Knowledge Bases for Expo-  
711 somics: Pubchemlite Meets Metfrag”. In: *Journal of Cheminformatics* (2021). ISSN: 2693-  
712 5015. URL: <https://doi.org/10.21203/rs.3.rs-107432/v1>.
- 713 [40] Andreas Schüller et al. “SMILIB: Rapid Assembly of Combinatorial Libraries in SMILES  
714 Notation”. In: *QSAR & Combinatorial Science* 22.7 (2003), pp. 719–721. DOI: <https://doi.org/10.1002/qsar.200310008>. eprint: <https://onlinelibrary.wiley.com/doi/pdf/10.1002/qsar.200310008>. URL: <https://onlinelibrary.wiley.com/doi/abs/10.1002/qsar.200310008>.
- 718 [41] Andreas Schüller et al. “SmiLib v2.0: A Java-Based Tool for Rapid Combinatorial Library  
719 Enumeration”. In: *QSAR & Combinatorial Science* 26.3 (2007), pp. 407–410. DOI: <https://doi.org/10.1002/qsar.200630101>. eprint: <https://onlinelibrary.wiley.com/doi/pdf/10.1002/qsar.200630101>. URL: <https://onlinelibrary.wiley.com/doi/abs/10.1002/qsar.200630101>.
- 723 [42] Martin Wainwright et al. “Tree consistency and bounds on the performance of the max-  
724 product algorithm and its generalizations”. In: *Statistics and Computing* 14.2 (Apr. 2004),  
725 pp. 143–166. ISSN: 1573-1375. DOI: 10.1023/B:STC0.0000021412.33763.d5. URL: <https://doi.org/10.1023/B:STC0.0000021412.33763.d5>.
- 727 [43] David J.C. MacKay. *Information theory, inference and learning algorithms*. Cambridge uni-  
728 versity press, 2005.
- 729 [44] Patrick Pletscher et al. “Spanning Tree Approximations for Conditional Random Fields”. In:  
730 *Proceedings of the Twelfth International Conference on Artificial Intelligence and Statistics*.  
731 Ed. by David van Dyk et al. Vol. 5. Proceedings of Machine Learning Research. Hilton  
732 Clearwater Beach Resort, Clearwater Beach, Florida USA: PMLR, 16–18 Apr 2009, pp. 408–  
733 415. URL: <http://proceedings.mlr.press/v5/pletscher09a.html>.
- 734 [45] Hongyu Su et al. “Multilabel classification through random graph ensembles”. In: *Machine*  
735 *Learning* 99.2 (2015), pp. 231–256. ISSN: 1573-0565. DOI: 10.1007/s10994-014-5465-9.  
736 URL: <https://doi.org/10.1007/s10994-014-5465-9>.
- 737 [46] Juho Rousu et al. “Kernel-based learning of hierarchical multilabel classification models”.  
738 In: *Journal of Machine Learning Research* 7. Jul (2006), pp. 1601–1626.



- 739 [47] Eric Bach. *massbank2db: Build a machine learning ready SQLite database from MassBank*.  
740 Version 0.9.0. Jan. 2022. URL: <https://github.com/bachi55/massbank2db>.
- 741 [48] André Elisseeff et al. “A kernel method for multi-labelled classification”. In: *Advances in*  
742 *neural information processing systems*. 2002, pp. 681–687.
- 743 [49] Thorsten Joachims. “Optimizing Search Engines Using Clickthrough Data”. In: *Proceedings*  
744 *of the Eighth ACM SIGKDD International Conference on Knowledge Discovery and Data*  
745 *Mining*. KDD '02. Edmonton, Alberta, Canada: ACM, 2002, pp. 133–142. ISBN: 1-58113-567-  
746 X. DOI: 10.1145/775047.775067. URL: <http://doi.acm.org/10.1145/775047.775067>.
- 747 [50] Tiejun Cheng et al. “Computation of Octanol-Water Partition Coefficients by Guiding an  
748 Additive Model with Knowledge”. In: *Journal of Chemical Information and Modeling* 47.6  
749 (2007). PMID: 17985865, pp. 2140–2148. DOI: 10.1021/ci700257y. eprint: <https://doi.org/10.1021/ci700257y>. URL: <https://doi.org/10.1021/ci700257y>.
- 751 [51] Yannick Djoumbou Feunang et al. “ClassyFire: automated chemical classification with a  
752 comprehensive, computable taxonomy”. In: *Journal of cheminformatics* 8.1 (2016), p. 61.
- 753 [52] Thomas Gärtner et al. “On structured output training: hard cases and an efficient alter-  
754 native”. In: *Machine Learning* 76.2 (2009), pp. 227–242. ISSN: 1573-0565. DOI: 10.1007/  
755 s10994-009-5129-3. URL: <https://doi.org/10.1007/s10994-009-5129-3>.
- 756 [53] Yexiang Xue et al. “Solving Marginal MAP Problems with NP Oracles and Parity Con-  
757 straints”. In: *Advances in Neural Information Processing Systems*. Ed. by D. Lee et al.  
758 Vol. 29. Curran Associates, Inc., 2016. URL: [https://proceedings.neurips.cc/paper/](https://proceedings.neurips.cc/paper/2016/file/a532400ed62e772b9dc0b86f46e583ff-Paper.pdf)  
759 [2016/file/a532400ed62e772b9dc0b86f46e583ff-Paper.pdf](https://proceedings.neurips.cc/paper/2016/file/a532400ed62e772b9dc0b86f46e583ff-Paper.pdf).
- 760 [54] Simon Lacoste-Julien et al. “Block-coordinate Frank-Wolfe optimization for structural SVMs”.  
761 In: *International Conference on Machine Learning*. PMLR. 2013, pp. 53–61.
- 762 [55] Marguerite Frank et al. “An algorithm for quadratic programming”. In: *Naval Research*  
763 *Logistics Quarterly* 3.1-2 (1956), pp. 95–110. DOI: 10.1002/nav.3800030109. eprint: [https://](https://onlinelibrary.wiley.com/doi/pdf/10.1002/nav.3800030109)  
764 [onlinelibrary.wiley.com/doi/pdf/10.1002/nav.3800030109](https://onlinelibrary.wiley.com/doi/pdf/10.1002/nav.3800030109). URL: [https://](https://onlinelibrary.wiley.com/doi/abs/10.1002/nav.3800030109)  
765 [onlinelibrary.wiley.com/doi/abs/10.1002/nav.3800030109](https://onlinelibrary.wiley.com/doi/abs/10.1002/nav.3800030109).
- 766 [56] Liva Ralaivola et al. “Graph kernels for chemical informatics”. In: *Neural networks* 18.8  
767 (2005), pp. 1093–1110.
- 768 [57] Stephen R. Heller et al. “InChI, the IUPAC International Chemical Identifier”. In: *Journal*  
769 *of Cheminformatics* 7.1 (2015), p. 23. ISSN: 1758-2946. DOI: 10.1186/s13321-015-0068-4.  
770 URL: <https://doi.org/10.1186/s13321-015-0068-4>.
- 771 [58] David Weininger. “SMILES, a chemical language and information system. 1. Introduction  
772 to methodology and encoding rules”. In: *Journal of Chemical Information and Computer*  
773 *Sciences* 28.1 (1988), pp. 31–36. DOI: 10.1021/ci00057a005. eprint: <https://pubs.acs.org/doi/pdf/10.1021/ci00057a005>. URL: <https://pubs.acs.org/doi/abs/10.1021/ci00057a005>.
- 776 [59] Jeramie Watrous et al. “Mass spectral molecular networking of living microbial colonies”. In:  
777 *Proceedings of the National Academy of Sciences* 109.26 (2012), E1743–E1752. ISSN: 0027-  
778 8424. DOI: 10.1073/pnas.1203689109. eprint: [https://www.pnas.org/content/109/26/](https://www.pnas.org/content/109/26/E1743.full.pdf)  
779 [E1743.full.pdf](https://www.pnas.org/content/109/26/E1743). URL: <https://www.pnas.org/content/109/26/E1743>.
- 780 [60] Florian Huber et al. “matchms - processing and similarity evaluation of mass spectrometry  
781 data.” In: *Journal of Open Source Software* 5.52 (2020), p. 2411. DOI: 10.21105/joss.02411.  
782 URL: <https://doi.org/10.21105/joss.02411>.
- 783 [61] David Rogers et al. “Extended-Connectivity Fingerprints”. In: *Journal of Chemical Infor-*  
784 *mation and Modeling* 50.5 (2010). PMID: 20426451, pp. 742–754. DOI: 10.1021/ci100050t.  
785 eprint: <http://dx.doi.org/10.1021/ci100050t>. URL: <http://dx.doi.org/10.1021/ci100050t>.  
786

- 787 [62] John W. Dolan. *Column Dead Time as a Diagnostic Tool*. Tech. rep. 1. Jan. 2014, pp. 24–29.  
788 URL: <http://www.chromatographyonline.com/column-dead-time-diagnostic-tool>.
- 789 [63] Kalervo Järvelin et al. “Cumulated Gain-Based Evaluation of IR Techniques”. In: *ACM*  
790 *Trans. Inf. Syst.* 20.4 (Oct. 2002), pp. 422–446. ISSN: 1046-8188. DOI: 10.1145/582415.  
791 582418. URL: <https://doi.org/10.1145/582415.582418>.
- 792 [64] F. Pedregosa et al. “Scikit-learn: Machine Learning in Python”. In: *Journal of Machine*  
793 *Learning Research* 12 (2011), pp. 2825–2830.
- 794 [65] Harris Drucker et al. “Support vector regression machines”. In: *Advances in neural infor-*  
795 *mation processing systems*. 1997, pp. 155–161.
- 796 [66] Eric Bach. *Retention Order Support Vector Machine (ROSVM)*. Version 0.4.0. Nov. 2021.  
797 URL: <https://github.com/bachi55/rosvm>.
- 798 [67] Egon L. Willighagen et al. “The Chemistry Development Kit (CDK) v2.0: atom typing,  
799 depiction, molecular formulas, and substructure searching”. In: *Journal of Cheminformatics*  
800 9.1 (June 2017), p. 33. ISSN: 1758-2946. DOI: 10.1186/s13321-017-0220-4. URL: <https://doi.org/10.1186/s13321-017-0220-4>.
- 801
- 802 [68] Eric Bach. *msmsrt\_scorer: Probabilistic framework for integration of mass spectrum and*  
803 *retention order information*. Version 0.2.3. Nov. 2021. URL: [https://github.com/aalto-](https://github.com/aalto-ics-kepaco/msms_rt_score_integration)  
804 [ics-kepaco/msms\\_rt\\_score\\_integration](https://github.com/aalto-ics-kepaco/msms_rt_score_integration).
- 805 [69] John Platt. “Probabilistic outputs for support vector machines and comparisons to regular-
- 806 ized likelihood methods”. In: *Advances in large margin classifiers* 10.3 (June 2000).

## 807 Acknowledgments

808 The work by E.B. and J.R. was in part supported by Academy of Finland grants 310107 (MA-  
809 COME) and 334790 (MAGITICS). E.L.S. acknowledges funding support from the Luxembourg  
810 National Research Fund (FNR) for project A18/BM/12341006 and discussions with Drs. Greg  
811 Landrum (ETHZ) and Evan Bolton (NCBI/NLM/NIH). The authors acknowledge CSC – IT Cen-  
812 ter for Science, Finland and Aalto Science-IT infrastructure, Finland for generous computational  
813 resources. E.B. thanks Dr. K. Dührkop for generating the SIRIUS candidate sets and predicting  
814 the SIRIUS MS<sup>2</sup> scores.

## 815 Authors contributions

816 E.B. and J.R. designed the research. E.B. implemented the MassBank pre-processing. E.B. devel-  
817 oped, implemented and evaluated the computational method. E.B., E.L.S. and J.R. interpreted  
818 the results. E.B., E.L.S. and J.R. wrote the manuscript.

## 819 Competing interests

820 The authors declare no competing interests.

## 821 Additional information

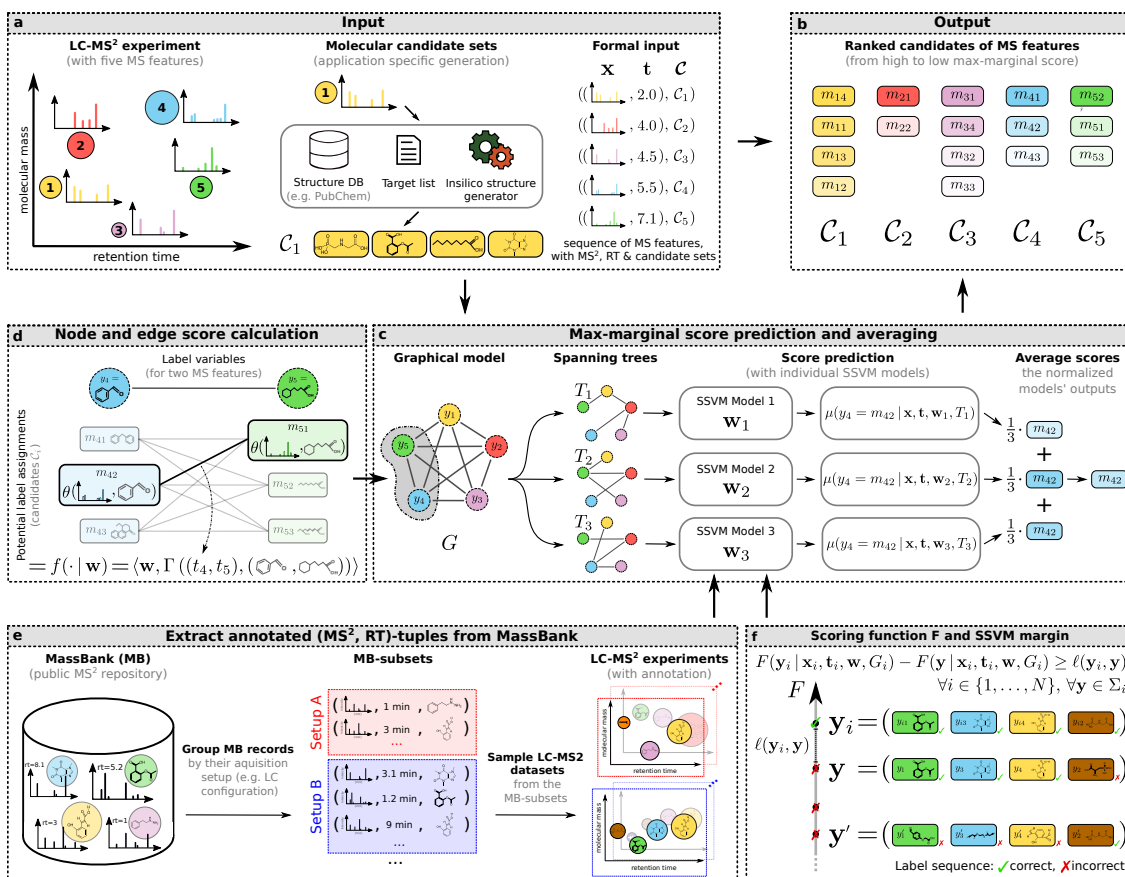

Figure 1: **Overview of the LC-MS<sup>2</sup>Struct workflow.** **a:** Input to LC-MS<sup>2</sup>Struct during the application phase. The LC-MS<sup>2</sup> experiment results in a set of (MS<sup>2</sup>, RT)-tuples. The MS information is used to generate a molecular candidate set for each MS feature. **b:** Output of LC-MS<sup>2</sup>Struct are the ranked molecular candidates for each MS feature. **c:** A fully connected graph  $G$  models the pairwise dependency between the MS features. Using a set of random spanning trees  $T_k$  and Structured Support Vector Machines (SSVM) we predict the max-marginal scores for each candidate used for the ranking. **d:** The MS<sup>2</sup> and RO information is used to scores the nodes and edges in the graph  $G$ . **e:** To train the SSVM models and evaluate LC-MS<sup>2</sup>Struct, we extract MS<sup>2</sup> spectra and RTs from MassBank. We group the MassBank records such that their experimental setups are matching and simulate LC-MS<sup>2</sup> experiment. **f:** Main objective optimized during the training of the SSVM.

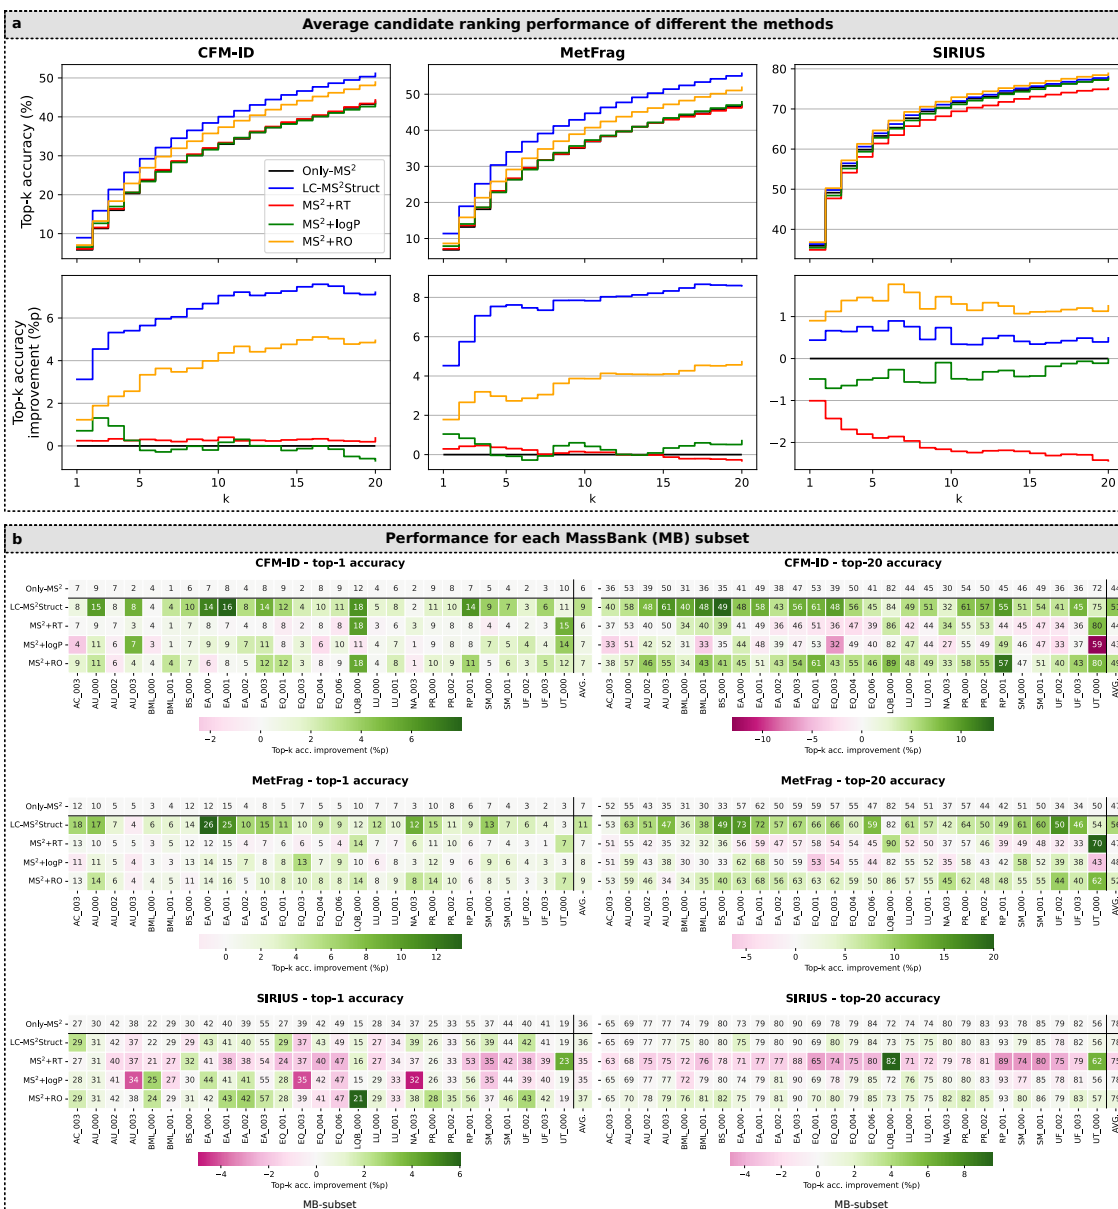

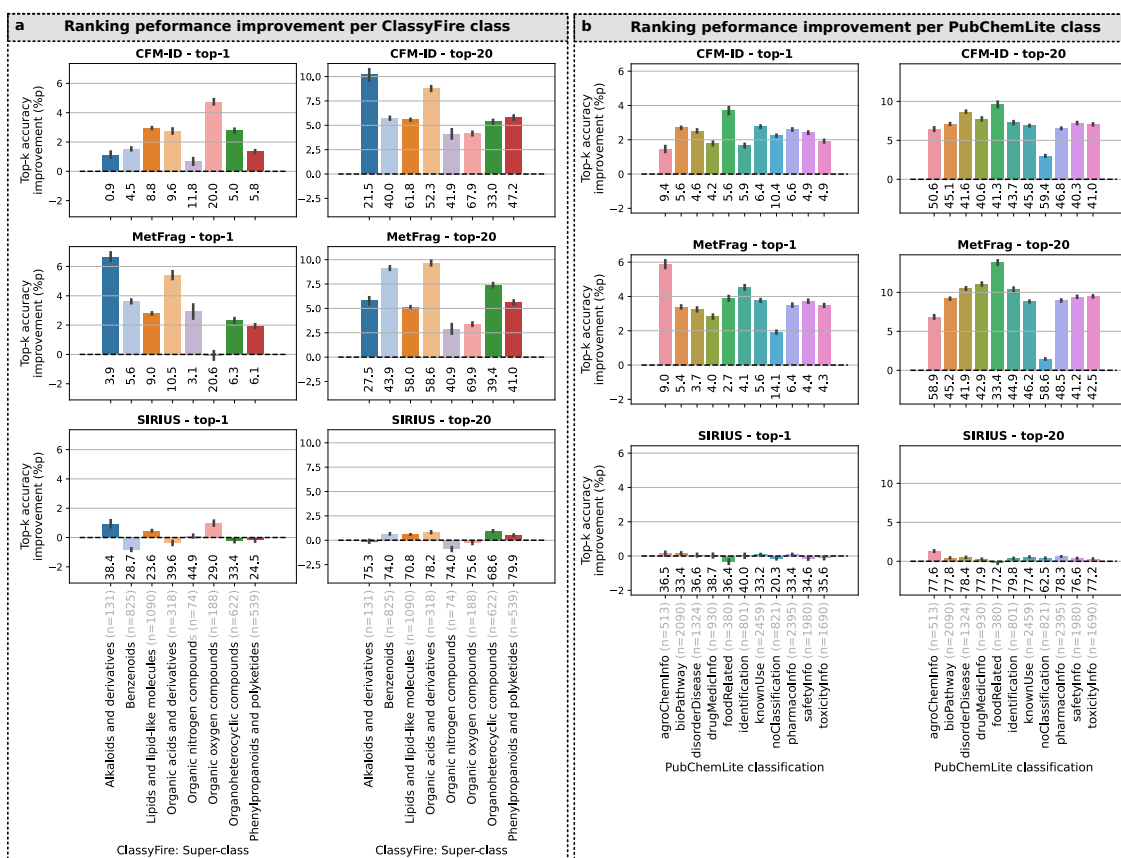

**Figure 3: Performance gain by LC-MS<sup>2</sup>Struct across molecular classes.** The figure shows the average and 95%-confidence interval of the ranking performance (top-k) improvement of LC-MS<sup>2</sup>Struct compared to Only-MS<sup>2</sup> (baseline). The top-k accuracies (%) under the bars show the Only-MS<sup>2</sup> performance. For each molecular class, the number of unique molecular structures in the class is denoted in the x-axis label (n). **a:** Molecular classification using the ClassyFire [51] framework. **b:** PubChemLite [39] annotation classification system. Molecules not present in PubChemLite are summarized under the “noClassification” category. Note that in PubChemLite a molecule can belong to multiple categories.

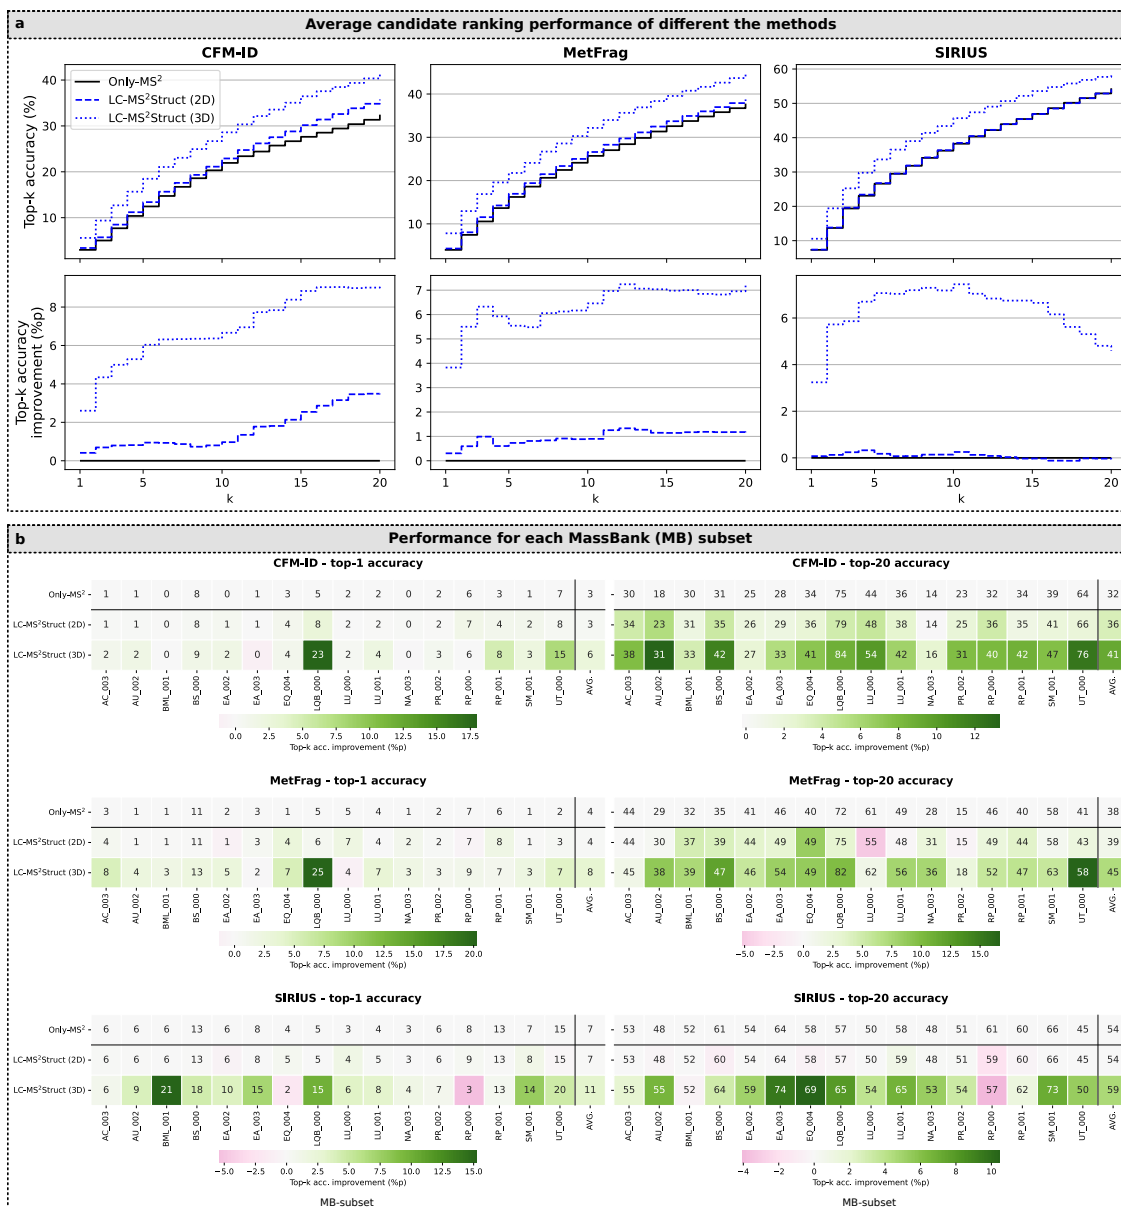

Figure 4: **Using LC-MS<sup>2</sup>Struct with different feature representations.** **a:** Comparison of the performance, measured by top-k accuracy, of LC-MS<sup>2</sup>Struct using either 2D (no stereochemistry) or 3D (with stereochemistry) molecular fingerprints. The results shown are averaged accuracies over 94 sample MS feature sequences (LC-MS<sup>2</sup> experiments). **b:** Average top-k accuracies per MassBank (MB) subset rounded to full integers. The color encodes the performance improvement of each score integration method compared to Only-MS<sup>2</sup>.

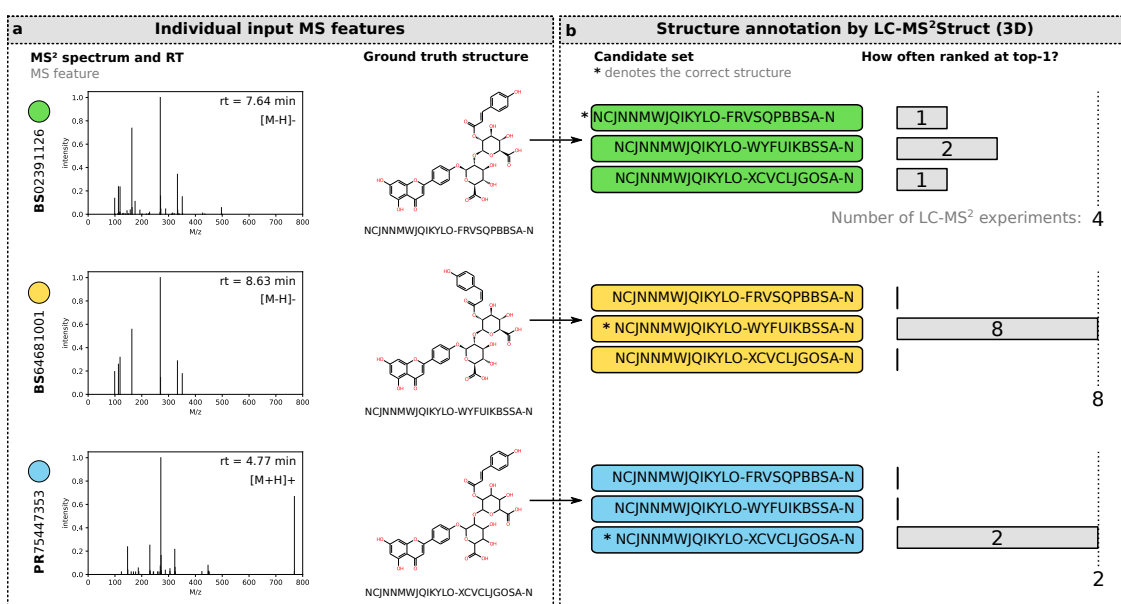

**Figure 5: Application of LC-MS<sup>2</sup>Struct to annotate stereoisomers.** Post-hoc analysis of the stereoisomer annotation using LC-MS<sup>2</sup>Struct for three (MS<sup>2</sup>, RT)-tuples from our MassBank data associated with the same 2D skeleton (InChIKey first block). In our evaluation, all three MS features were analysed multiple times in different contexts (BS02391126 in 4, BS64681001 in 8 and PR75447353 in 2 LC-MS<sup>2</sup> experiments). **a:** MS features with their ground truth annotations. Two of the spectra (starting with BS) were measured under the same LC condition (MB-subset “BS\_000”), demonstrating the separation of *E/Z*-isomers on LC columns. **b:** The candidate sets of the three features are identical (defined by the molecular formula C<sub>36</sub>H<sub>32</sub>O<sub>19</sub>) and only contain three structures. For 12 out of the 14 LC-MS<sup>2</sup> experiments, LC-MS<sup>2</sup>Struct predicts the correct *E/Z*-isomer.

## 822 **Extended data figures and tables**



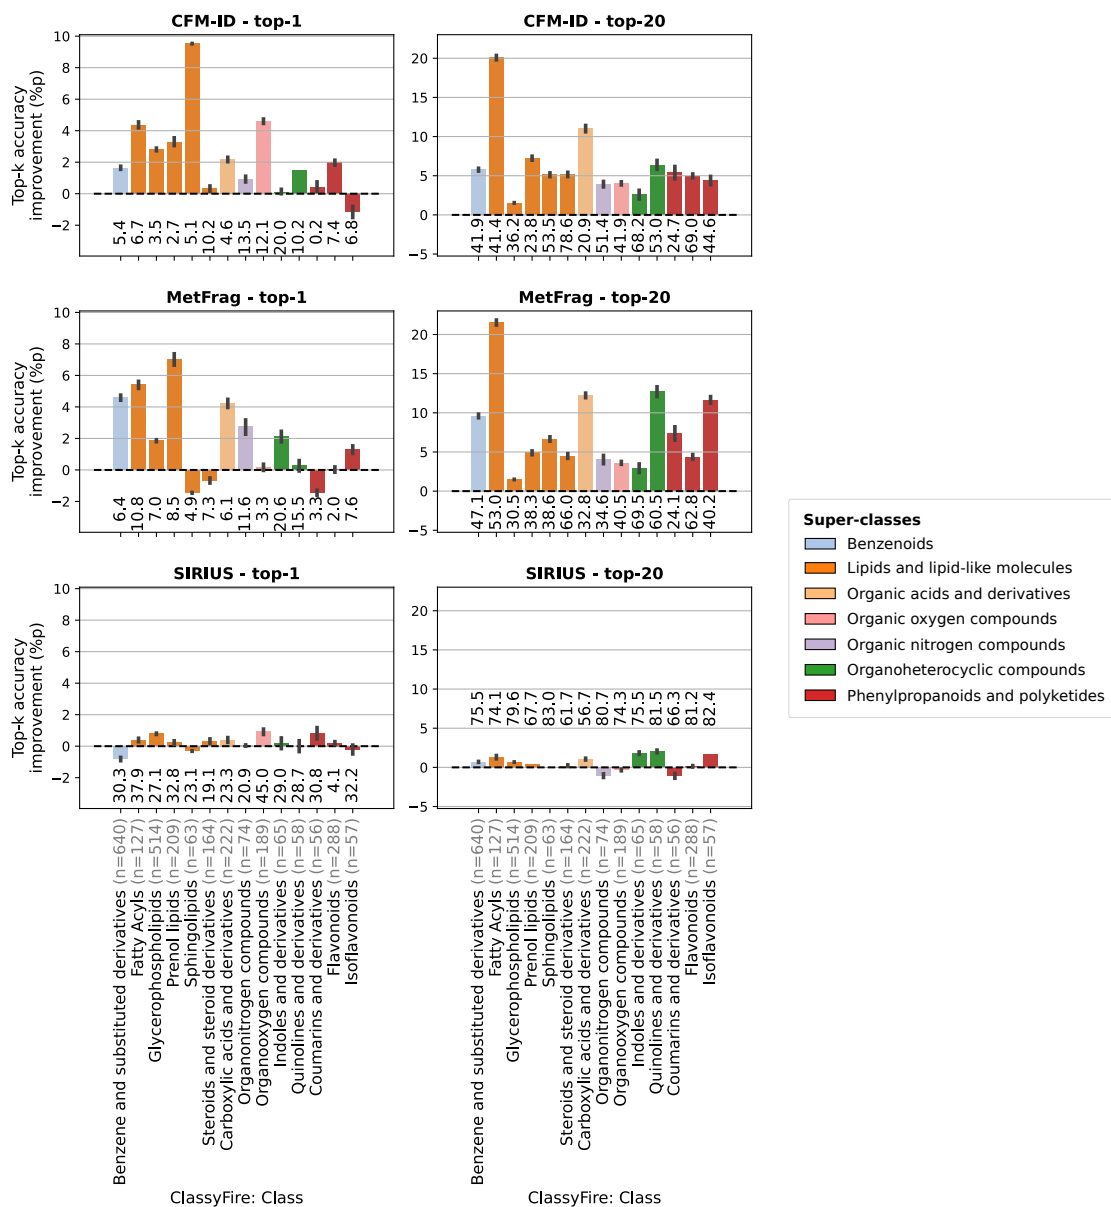

Figure 6: **Performance gain by LC-MS<sup>2</sup>Struct across ClassyFire class-level annotations.** The figure shows the average and 95%-confidence interval of the ranking performance (top-k) improvement of LC-MS<sup>2</sup>Struct compared to Only-MS<sup>2</sup> (baseline). The top-k accuracies (%) under the bars show the Only-MS<sup>2</sup> performance. For each molecule class, the number of unique molecular structures in the class is denoted in the x-axis label (n).

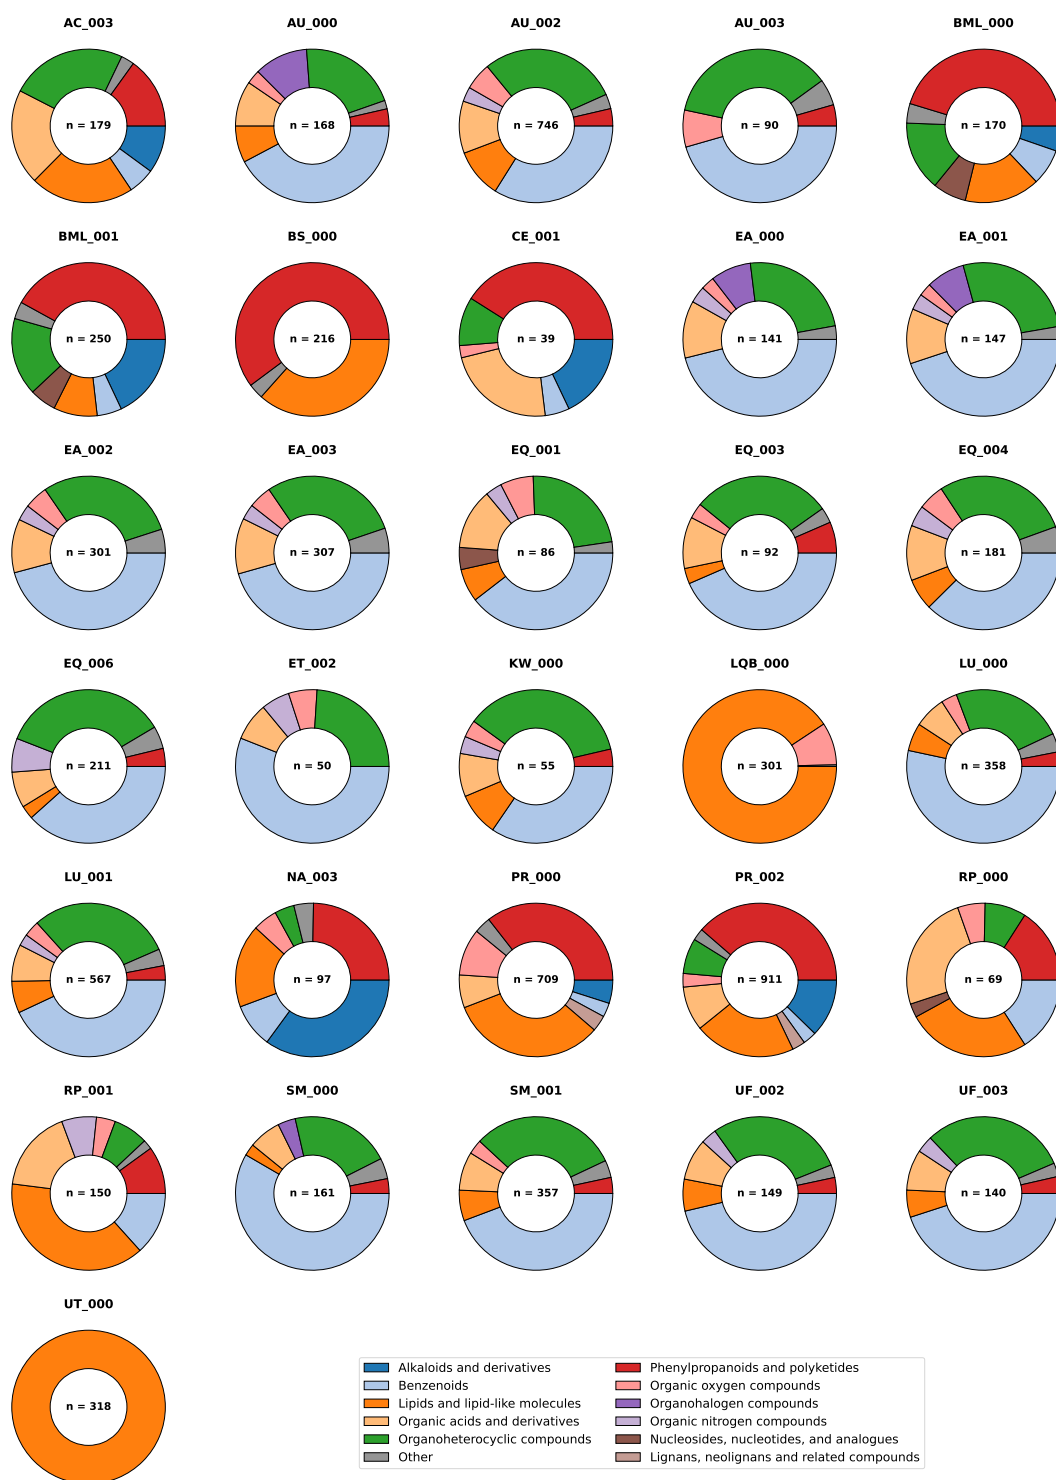

Figure 7: **Distribution of molecule classes in the MassBank (MB) subsets.** ClassyFire super-class distribution [51] for each MB-subset studied in our experiments. Within each MB-subset, the label “Other” is assigned to each super-class which makes up less than 2.5% of all molecules. The center label represents the number of examples for the respective MB-subset.

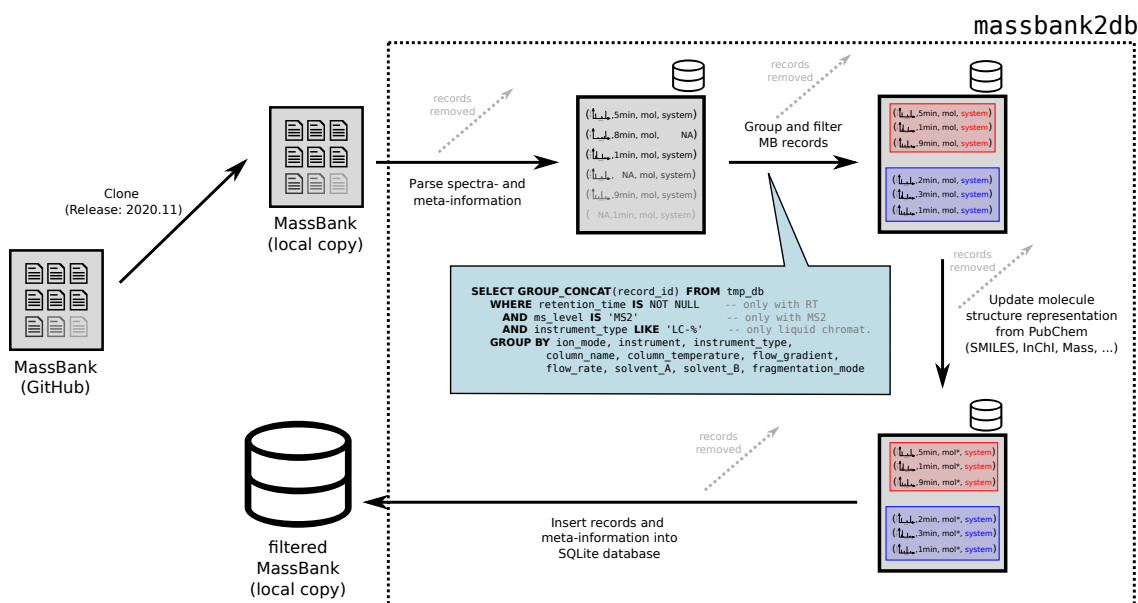

Figure 8: **Processing pipeline of the MassBank data.** Illustration of the processing pipeline to extract the training data from MassBank. The depicted workflow is implemented in the “massbank2db” Python package [47].

Table 1: **Training and evaluation dataset sizes in our experiments.** We provide the number (#) of (MS<sup>2</sup>, RT)-tuples used for the generation of training and evaluation LC-MS<sup>2</sup> experiments. For the ALLDATA setup the training and evaluation tuple-set is equal. The number of evaluation LC-MS<sup>2</sup> experiments depends on the number of available evaluation tuples.

| MB-subset | ALLDATA |       | ONLYSTEREO       |                 |       |
|-----------|---------|-------|------------------|-----------------|-------|
|           | #Tuples | #Exp. | #Tuples (train.) | #Tuples (eval.) | #Exp. |
| AC_003    | 179     | 15    | 172              | 157             | 15    |
| AU_000    | 168     | 15    | 146              | 23              | -     |
| AU_002    | 746     | 14    | 578              | 172             | 15    |
| AU_003    | 90      | 15    | 77               | 21              | -     |
| BML_000   | 170     | 15    | 77               | 24              | -     |
| BML_001   | 250     | 15    | 125              | 33              | 1     |
| BS_000    | 216     | 15    | 205              | 135             | 15    |
| CE_001    | 39      | 1     | 30               | 19              | -     |
| EA_000    | 141     | 15    | 118              | 19              | -     |
| EA_001    | 147     | 15    | 126              | 19              | -     |
| EA_002    | 301     | 6     | 240              | 56              | 1     |
| EA_003    | 307     | 6     | 246              | 57              | 1     |
| EQ_001    | 86      | 15    | 68               | 28              | -     |
| EQ_003    | 92      | 15    | 64               | 6               | -     |
| EQ_004    | 181     | 15    | 127              | 51              | 1     |
| EQ_006    | 211     | 15    | 138              | 15              | -     |
| ET_002    | 50      | 1     | 29               | 2               | -     |
| KW_000    | 55      | 1     | 43               | 4               | -     |
| LQB_000   | 301     | 6     | 271              | 270             | 5     |
| LU_000    | 358     | 7     | 311              | 50              | 1     |
| LU_001    | 567     | 11    | 472              | 101             | 15    |
| NA_003    | 97      | 15    | 91               | 73              | 1     |
| PR_000    | 709     | 14    | 131              | 21              | -     |
| PR_002    | 911     | 18    | 391              | 250             | 15    |
| RP_000    | 69      | 1     | 55               | 35              | 1     |
| RP_001    | 150     | 15    | 119              | 73              | 1     |
| SM_000    | 161     | 15    | 136              | 12              | -     |
| SM_001    | 357     | 7     | 280              | 30              | 1     |
| UF_002    | 149     | 15    | 124              | 18              | -     |
| UF_003    | 140     | 15    | 115              | 15              | -     |
| UT_000    | 318     | 6     | 294              | 293             | 5     |
| Total     | 7716    | 354   | 5399             | 2082            | 94    |

Table 2: **Median candidate set size for the MassBank (MB) subsets.** The table shows the median number of molecular candidates per MB-subset used in our experiments. In the ALLDATA setup the candidates are identified by their InChIKey first block, where as for the Only-MS<sup>2</sup> setup the full InChIKey is used. The candidate number is computed based on the MB records which are used in the simulated LC-MS<sup>2</sup> experiments. For ONLYSTEREO, some MB-subsets are not used in the evaluation, and therefore their candidate set size is omitted (-).

| MB-subset | ALLDATA | ONLYSTEREO |
|-----------|---------|------------|
| AC_003    | 305     | 384        |
| AU_000    | 269     | -          |
| AU_002    | 1018.5  | 1434.5     |
| AU_003    | 1297    | -          |
| BML_000   | 689     | -          |
| BML_001   | 1013.5  | 1688       |
| BS_000    | 429     | 258        |
| CE_001    | 819     | -          |
| EA_000    | 771     | -          |
| EA_001    | 570     | -          |
| EA_002    | 1373    | 1239       |
| EA_003    | 1306    | 1097       |
| EQ_001    | 425     | -          |
| EQ_003    | 759.5   | -          |
| EQ_004    | 872     | 1027       |
| EQ_006    | 1045    | -          |
| ET_002    | 4957    | -          |
| KW_000    | 2010    | -          |
| LQB_000   | 73      | 106        |
| LU_000    | 533     | 362.5      |
| LU_001    | 998     | 751        |
| NA_003    | 1024    | 1608       |
| PR_000    | 109     | -          |
| PR_002    | 228     | 636        |
| RP_000    | 760     | 1015       |
| RP_001    | 658     | 723        |
| SM_000    | 312     | -          |
| SM_001    | 800     | 1095.5     |
| UF_002    | 1498    | -          |
| UF_003    | 1392.5  | -          |
| UT_000    | 56      | 93         |

Table 3: **MassBank (MB) information used to group the records.** Two MassBank records are considered to belong to the same MB-subset in our experiments, if all properties listed in the table are equal between them. See <https://github.com/MassBank/MassBank-web/blob/main/Documentation/MassBankRecordFormat.md> for a more comprehensive description of the MassBank records' fields.

| Property           | Description                                                               | Example                           |
|--------------------|---------------------------------------------------------------------------|-----------------------------------|
| contributor        | Contributor who uploaded a MassBank record                                | BGC_Munich                        |
| accession_prefix   | 2-3 character long prefix further specifying the records of a contributor | EA, EQ                            |
| instrument_type    | General type of instrument used for the LC-MS analysis                    | LC-ESI-QTOF                       |
| ion_mode           | MS Ionization mode                                                        | negative                          |
| instrument         | Commercial name and manufacturer of the MS instrument                     | Bruker maXis Impact               |
| fragmentation_mode | Fragmentation method used for dissociation or fragmentation               | CID                               |
| column_name        | Commercial name and manufacturer of the LC instrument                     | Symmetry C18 Column, Waters       |
| column_temperature | Static column temperature in LC-MS                                        | 40 C                              |
| flow_gradient      | Gradient of mobile phases in LC-MS                                        | 0min:5%, 24min:95% (acetonitrile) |
| flow_rate          | Flow Rate of liquid phase in LC                                           | 300 uL/min                        |
| solvent_A          | Chemical composition of buffer solution (A)                               | H2O(0.1%HCOOH)                    |
| solvent_B          | Chemical composition of buffer solution (B)                               | CH3CN(0.1%HCOOH)                  |

## <sup>823</sup> Supplementary material

Table 4: **Meta-information for the MassBank (MB) subsets.** The the LC- and MS-conditions for each MB-subset.

THIS TABLE IS PROVIDED IN A SEPARATE FILE: `massbank_groups_meta_data.tsv`
